# Supplementary material
Source: Royal Society of Chemistry journal article supplement (doi:10.1039/d6cp01376g)
Supplement: d6cp01376g1.pdf [file d6cp01376g1.pdf]

Supporting Information for

## Push-Pull Derivatives Based on CF<sub>3</sub>-Substituted Pyrimidines as Solvatofluorochromic Materials for OLEDs

L.I.Valiulina<sup>a\*</sup>, K. Khoroshkin<sup>a</sup>, A.E. Kurtsevich<sup>a</sup>, K.M. Degtyarenko<sup>a</sup>, N.V. Izmailova<sup>a</sup>, N.S. Demina<sup>b</sup>, D.L. Chizhov<sup>b</sup>, E.V. Verbitskiy<sup>b,c</sup>, V.P. Tuguldurova<sup>a</sup>, R.Valiyyev<sup>a</sup>

<sup>a</sup> Tomsk State University, 36 Lenin Avenue, Tomsk, 634050, Russian Federation

<sup>b</sup> I. Ya. Postovsky Institute of Organic Synthesis, Ural Branch of the Russian Academy of Sciences, S. Kovalevskaya Str., 22, 620066 Ekaterinburg, Russian Federation

<sup>c</sup>Department of Organic and Biomolecular Chemistry, Ural Federal University, Mira St. 19, Ekaterinburg 620002, Russian Federation

Correspondence to: [valiulina.lenara.01.01.1998@gmail.com](mailto:valiulina.lenara.01.01.1998@gmail.com)

### Table of Content

|                                                                                   |    |
|-----------------------------------------------------------------------------------|----|
| Synthesis of push-pull systems.....                                               | 3  |
| NMR Spectra of push-pull systems.....                                             | 5  |
| Figure S1. <sup>1</sup> H NMR (500 MHz, CDCl <sub>3</sub> ) spectrum of 3.....    | 6  |
| Figure S2. <sup>19</sup> F NMR (471 MHz, CDCl <sub>3</sub> ) spectrum of 3.....   | 6  |
| Figure S3. <sup>13</sup> C NMR (126 MHz, CDCl <sub>3</sub> ) spectrum of 3.....   | 7  |
| Figure S4. <sup>1</sup> H NMR (500 MHz, CDCl <sub>3</sub> ) spectrum of 5a.....   | 7  |
| Figure S5. <sup>19</sup> F NMR (471 MHz, CDCl <sub>3</sub> ) spectrum of 5a.....  | 8  |
| Figure S6. <sup>13</sup> C NMR (126 MHz, CDCl <sub>3</sub> ) spectrum of 5a.....  | 8  |
| Figure S7. <sup>1</sup> H NMR (500 MHz, CDCl <sub>3</sub> ) spectrum of 5b.....   | 9  |
| Figure S8. <sup>19</sup> F NMR (471 MHz, CDCl <sub>3</sub> ) spectrum of 5b.....  | 9  |
| Figure S9. <sup>13</sup> C NMR (126 MHz, CDCl <sub>3</sub> ) spectrum of 5b.....  | 10 |
| Figure S10. <sup>1</sup> H NMR (500 MHz, CDCl <sub>3</sub> ) spectrum of 5c.....  | 10 |
| Figure S11. <sup>19</sup> F NMR (471 MHz, CDCl <sub>3</sub> ) spectrum of 5c..... | 11 |
| Figure S12. <sup>13</sup> C NMR (126 MHz, CDCl <sub>3</sub> ) spectrum of 5c..... | 11 |
| Figure S13. <sup>1</sup> H NMR (500 MHz, CDCl <sub>3</sub> ) spectrum of 7a.....  | 12 |
| Figure S14. <sup>19</sup> F NMR (471 MHz, CDCl <sub>3</sub> ) spectrum of 7a..... | 12 |
| Figure S15. <sup>13</sup> C NMR (126 MHz, CDCl <sub>3</sub> ) spectrum of 7a..... | 13 |
| Figure S16. <sup>1</sup> H NMR (500 MHz, CDCl <sub>3</sub> ) spectrum of 7b.....  | 13 |
| Figure S17. <sup>19</sup> F NMR (471 MHz, CDCl <sub>3</sub> ) spectrum of 7b..... | 14 |
| Figure S18. <sup>13</sup> C NMR (126 MHz, CDCl <sub>3</sub> ) spectrum of 7b..... | 14 |
| Figure S19. <sup>1</sup> H NMR (400 MHz, CDCl <sub>3</sub> ) spectrum of 7c.....  | 15 |
| Figure S20. <sup>19</sup> F NMR (471 MHz, CDCl <sub>3</sub> ) spectrum of 7c..... | 15 |
| Figure S21. <sup>13</sup> C NMR (126 MHz, CDCl <sub>3</sub> ) spectrum of 7c..... | 16 |

|                                                                                                                                                                |    |
|----------------------------------------------------------------------------------------------------------------------------------------------------------------|----|
| Figure S22. $^1\text{H}$ NMR (500 MHz, $\text{CDCl}_3$ ) spectrum of 8a .....                                                                                  | 16 |
| Figure S23. $^{19}\text{F}$ NMR (471 MHz, $\text{CDCl}_3$ ) spectrum of 8a .....                                                                               | 17 |
| Figure S24. $^{13}\text{C}$ NMR (126 MHz, $\text{CDCl}_3$ ) spectrum of 8a .....                                                                               | 17 |
| Figure S25. $^1\text{H}$ NMR (500 MHz, $\text{CDCl}_3$ ) spectrum of 8b .....                                                                                  | 18 |
| Figure S26. $^{19}\text{F}$ NMR (471 MHz, $\text{CDCl}_3$ ) spectrum of 8b .....                                                                               | 18 |
| Figure S27. $^{13}\text{C}$ NMR (126 MHz, $\text{CDCl}_3$ ) spectrum of 8b .....                                                                               | 19 |
| Figure S28. $^1\text{H}$ NMR (500 MHz, $\text{CDCl}_3$ ) spectrum of 8c .....                                                                                  | 19 |
| Figure S29. $^{19}\text{F}$ NMR (471 MHz, $\text{CDCl}_3$ ) spectrum of 8c .....                                                                               | 20 |
| Figure S30. $^{13}\text{C}$ NMR (126 MHz, $\text{CDCl}_3$ ) spectrum of 8c .....                                                                               | 20 |
| Figure S31. $^1\text{H}$ NMR (500 MHz, $\text{CDCl}_3$ ) spectrum of 9a .....                                                                                  | 21 |
| Figure S32. $^{19}\text{F}$ NMR (471 MHz, $\text{CDCl}_3$ ) spectrum of 9a .....                                                                               | 21 |
| Figure S33. $^{13}\text{C}$ NMR (151 MHz, $\text{CDCl}_3$ ) spectrum of 9a .....                                                                               | 22 |
| Figure S34. $^1\text{H}$ NMR (500 MHz, $\text{CDCl}_3$ ) spectrum of 9b .....                                                                                  | 22 |
| Figure S35. $^{19}\text{F}$ NMR (471 MHz, $\text{CDCl}_3$ ) spectrum of 9b .....                                                                               | 23 |
| Figure S36. $^{13}\text{C}$ NMR (151 MHz, $\text{CDCl}_3$ ) spectrum of 9b .....                                                                               | 23 |
| Figure S37. $^1\text{H}$ NMR (600 MHz, $\text{CDCl}_3$ ) spectrum of 9c .....                                                                                  | 24 |
| Figure S38. $^{19}\text{F}$ NMR (376 MHz, $\text{CDCl}_3$ ) spectrum of 9c .....                                                                               | 24 |
| Figure S39. $^{13}\text{C}$ NMR (151 MHz, $\text{CDCl}_3$ ) spectrum of 9c .....                                                                               | 25 |
| Table S1. Calculated fluorescence emission wavelengths obtained using MN15 and CAM-B3LYP functionals .....                                                     | 25 |
| Table S2. Spectral characteristics of the studied push-pull systems in different solvents .....                                                                | 26 |
| Table S3. Contour plots of the frontier orbitals of the studied push-pull systems with the largest contributions to the $S_0 \rightarrow S_1$ transition ..... | 27 |
| Table S4. External Quantum Efficiency (EQE) of OLEDs based on push-pull systems .....                                                                          | 29 |
| Figure S40. The photo of the emission for device based on the compound 9b .....                                                                                | 30 |

## General Information.

All reagents were purchased from commercial sources and were used without further purification. 1,4-Dioxane for the microwave-assisted Suzuki cross-coupling reaction were deoxygenated by bubbling argon for 1 h. The  $^1\text{H}$  and  $^{13}\text{C}$  NMR spectra were recorded on a Bruker DRX-400, AVANCE-500 and AVANCE-600 instruments using  $\text{Me}_4\text{Si}$  as an internal standard. Elemental analysis was carried on a Eurovector EA 3000 automated analyzer. High resolution mass spectrometry was performed using a Bruker maXis Impact HD spectrometer. Melting points were determined on Boetius combined heating stages and were not corrected. Flash-column chromatography was carried out using Alfa Aesar silica gel 0.040-0.063 mm (230-400 mesh), eluting with chloroform. The progress of reactions and the purity of compounds were checked by TLC on Sorbfil plates (Russia), in which the spots were visualized with UV light ( $\lambda$  254 or 365 nm).

## Synthesis of push-pull systems

**1-(4-(Dimethylamino)phenyl)-4,4,4-trifluoro-3-hydroxy-2-buten-1-one (3).** In a 250 mL round bottom flask finely powdered lithium hydride (0.6 g, 75 mmol) was suspended in 100 mL of methyl *tert*-butyl ether (MTBE) and ethyl trifluoroacetate (11.00 g, 77.5 mmol) was added. 4-Acetyl-*N,N*-dimethylaniline **1** (8.16 g, 50 mmol) was then added in one portion with vigorous stirring and the reaction mixture was stirred at refluxing until TLC (silica,  $\text{CHCl}_3$ ) showed complete consumption of the starting material (approx. 6-7 hours). All volatiles were removed on rotary evaporator, a residue was dissolved in glacial acetic acid (ca. 20 ml) and 85% phosphoric acid (8.50 g, 73.7 mmol) was added. The obtained solution was diluted with water (ca. 200 mL) and a precipitate was filtered off, washed with water (3x50 ml) and dried on air to yield 11.80 g (91 %) of **2** as yellow powder. m.p. 69-71 °C  $^1\text{H}$  NMR (500 MHz,  $\text{CDCl}_3$ )  $\delta$  15.82 (br. s, 1H, enol-OH), 7.86 (d,  $J$  = 9.2 Hz, 2H), 6.68 (d,  $J$  = 9.2 Hz, 2H), 6.44 (s, 1H), 3.11 (s, 6H).  $^{19}\text{F}$  NMR (471 MHz,  $\text{CDCl}_3$ )  $\delta$  85.61 ( $\text{CF}_3$ ).  $^{13}\text{C}$  NMR (126 MHz,  $\text{CDCl}_3$ )  $\delta$  40.0 ( $(\text{CH}_3)_2\text{N}$ ), 90.5 (q,  $J$  = 2.2 Hz, =CH-), 111.1, 117.7 (q,  $J$  = 282.6,  $\text{CF}_3$ ), 119.4, 130.1, 154.3, 174.5 (q,  $J$  = 35.4 Hz,  $\text{CF}_3\text{C}=\text{O}$ ), 186.1 (C=O). Calcd. for  $\text{C}_{12}\text{H}_{12}\text{F}_3\text{NO}_2$  (259.23): C, 55.60; H, 4.67; N, 5.40; F, 21.99. Found: C, 55.43; H, 4.74; N, 5.22; F, 22.09.

**4-(2-(4-Bromophenyl)-6-(trifluoromethyl)pyrimidin-4-yl)-*N,N*-dimethylaniline (5a).** A suspension of 4-bromobenzamidine hydrochloride **4a** (0.78 g, 3.3 mmol) and  $\text{Et}_3\text{N}$  (0.91 g, 9.0 mmol) in acetonitrile (20 ml) was refluxed for 5 min. Then diketone **3** (0.77 g, 3.0 mmol) and triethylborate (2.19 g, 15 mmol) were added and the reaction mixture was stirred at refluxing until complete consumption of the starting material (ca. 5 hours). Then all volatiles were removed, a residue was washed several times with water (4x20 mL), dried on air and dissolved in  $\text{CH}_2\text{Cl}_2$  (ca. 5 mL). The obtained solution was passed through a silica-pad (ca. 2 cm) and the silica was washed with  $\text{CH}_2\text{Cl}_2$  (4x5 mL). Combined solutions were dissolved in methanol (ca. 50 mL),  $\text{CH}_2\text{Cl}_2$  was distilled off on rotary evaporator at standard pressure and the obtained suspension was cooled at 0-4 °C for 1 h. A precipitate was filtered off, washed with cold methanol (3x10 mL) and dried on air to yield 1.09 g (87 %) **5a** as yellow crystalline powder. m.p. 183-184 °C.  $^1\text{H}$  NMR (500 MHz,  $\text{CDCl}_3$ )  $\delta$  3.10 (s, 6H, 2 $\text{CH}_3$ ), 6.78-6.81 (m, 2H, H-3,5 Ar), 7.63-7.65 (m, 2H, H-2,6 Ar), 7.76 (s, 1H, H-5 Pyr), 8.16-8.19 (m, 2H, Ar), 8.47-8.49 (m, 2H, Ar).  $^{19}\text{F}$  NMR (471 MHz,  $\text{CDCl}_3$ )  $\delta$  91.57 (s,  $\text{CF}_3$ ).  $^{13}\text{C}$  NMR (126 MHz,  $\text{CDCl}_3$ )  $\delta$  40.1 ( $(\text{CH}_3)_2\text{N}$ ), 108.2 (q,  $J$  = 2.6 Hz, C-5 Pyr), 111.7, 121.1 (q,  $J$  = 275.1,  $\text{CF}_3$ ), 122.6, 125.9, 128.8, 130.2, 131.7, 136.1, 152.9, 155.8 (q,  $J$  = 35.1 Hz, C-6 Pyr), 164.0, 166.1. Calcd. for  $\text{C}_{19}\text{H}_{15}\text{BrF}_3\text{N}_3$  (422.25): C 54.05, H 3.58, N 9.95, F 13.50. Found: C 54.16, H 3.69, N 9.97, F 13.36.

**4-(2-(3-Bromophenyl)-6-(trifluoromethyl)pyrimidin-4-yl)-*N,N*-dimethylaniline (5b).** A suspension of 3-bromobenzamidine hydrochloride **4b** (0.78 g, 3.3 mmol) and  $\text{Et}_3\text{N}$  (0.91 g, 9.0 mmol) in acetonitrile (20 mL) was refluxed for 5 min. Then diketone **3** (0.77 g, 3.0 mmol) and triethylborate (2.19 g, 15 mmol) were added and the reaction mixture was stirred at refluxing until complete consumption of the starting material (ca. 5 hours). Then all volatiles were removed, a residue was washed several times with water (4x20 mL), dried on air and dissolved in  $\text{CH}_2\text{Cl}_2$  (ca. 5 mL). The obtained solution was passed through a silica-pad (ca. 2 cm) and the silica was washed with  $\text{CH}_2\text{Cl}_2$  (4x5 mL). Combined solutions were dissolved in methanol (ca. 50 mL),  $\text{CH}_2\text{Cl}_2$  was distilled off on rotary evaporator at standard pressure and the obtained suspension was cooled at 0-4 °C for 1 h. A precipitate was filtered off, washed with cold methanol (3x10 mL) and dried on air to yield 1.14 g (91 %) **5b** as yellow crystalline powder. m.p. 153-154 °C.  $^1\text{H}$  NMR (500 MHz,  $\text{CDCl}_3$ )  $\delta$  3.10 (s, 6H, 2 $\text{CH}_3$ ), 6.79-6.83 (m, 2H, H-3,5 Ar), 7.39 (t, 1H,  $J$  = 7.9 Hz, Ar(Br)), 7.64 (ddd, 1H,  $J$  = 7.9, 2.0, 1.0 Hz, Ar(Br)), 7.77 (s, 1H, H-5 Pyr), 8.17-8.21 (m, 2H, Ar), 8.53-8.55 (m, 1H, Ar(Br)) 8.74 (m, 1H, Ar(Br)).  $^{19}\text{F}$  NMR (471 MHz,  $\text{CDCl}_3$ )  $\delta$  91.60 (s,  $\text{CF}_3$ ).  $^{13}\text{C}$  NMR (126 MHz,  $\text{CDCl}_3$ )  $\delta$  40.0 ( $(\text{CH}_3)_2\text{N}$ ), 108.5 (q,  $J$  = 2.8 Hz, C-5 Pyr), 111.7, 121.0 (q,  $J$  = 275.2,  $\text{CF}_3$ ), 122.5, 122.8, 127.2, 128.8, 130.0, 131.5, 133.9, 139.2, 153.0, 155.8 (q,  $J$  = 35.2 Hz, C-6 Pyr), 163.5, 166.1. Calcd. for  $\text{C}_{19}\text{H}_{15}\text{BrF}_3\text{N}_3$  (422.25): C 54.05, H 3.58, N 9.95, F 13.50. Found: C 54.09, H 3.51, N 10.06, F 13.54.

**4-(2-(3,5-Dibromophenyl)-6-(trifluoromethyl)pyrimidin-4-yl)-*N,N*-dimethylaniline (5c).** A suspension of 3,5-dibromobenzamidine hydrochloride **4c** (1.04 g, 3.3 mmol) and  $\text{Et}_3\text{N}$  (0.91 g, 9.0 mmol) in acetonitrile (20 mL) was

refluxed for 5 min. Then diketone **3** (0.77 g, 3.0 mmol) and triethylborate (2.19 g, 15 mmol) were added and the reaction mixture was stirred at refluxing until complete consumption of the starting material (ca. 5 hours). Then all volatiles were removed, a residue was washed several times with water (4×20 ml), dried on air and dissolved in CH<sub>2</sub>Cl<sub>2</sub> (ca. 5 mL). The obtained solution was passed through a silica-pad (ca. 2 cm) and the silica was washed with CH<sub>2</sub>Cl<sub>2</sub> (4×5 mL). Combined solutions were dissolved in methanol (ca. 50 mL), CH<sub>2</sub>Cl<sub>2</sub> was distilled off on rotary evaporator at standard pressure and the obtained suspension was cooled at 0-4 °C for 1 h. A precipitate was filtered off, washed with cold methanol (3×10 mL) and dried on air to yield 1.39 g (93 %) of **5c** as bright yellow crystalline powder. m.p. 217-218 °C. <sup>1</sup>H NMR (500 MHz, CDCl<sub>3</sub>) δ 3.11 (s, 6H, 2CH<sub>3</sub>), 6.81-6.82 (m, 2H, H-3,5Ar), 7.78 (s, 1H, H-5 Pyr), 7.80 (t, 1H, *J* = 1.6 Hz, H-4 Ar(Br)), 8.16-8.18 (m, 2H, H-2,6 Ar), 8.67 (d, 2H, *J* = 1.6 Hz, H-2,6 Ar(Br)). <sup>19</sup>F NMR (471 MHz, CDCl<sub>3</sub>) δ 91.63 (s, CF<sub>3</sub>). <sup>13</sup>C NMR (126 MHz, CDCl<sub>3</sub>) δ 40.1 ((CH<sub>3</sub>)<sub>2</sub>N), 108.9 (q, *J* = 2.8 Hz, C-5 Pyr), 111.7, 120.9 (q, *J* = 275.2, CF<sub>3</sub>), 122.1, 123.2, 128.9, 130.3, 136.2, 140.5, 153.1, 155.8 (q, *J* = 35.3 Hz, C-6 Pyr), 162.2, 166.3. Calcd. for C<sub>19</sub>H<sub>14</sub>Br<sub>2</sub>F<sub>3</sub>N<sub>3</sub> (501.15): C 45.54, H 2.82, N 8.38, F 11.37. Found: C 45.42, H 2.98, N 8.25, F 11.50.

**General procedure for the Suzuki cross-coupling reactions for the synthesis of compounds (7a-c and 8a-c):** (Het)arylboronic acid pinacol ester (0.6 mmol, 1.2 equiv.) and corresponding 4-(2-(4-bromophenyl)-6-(trifluoromethyl)pyrimidin-4-yl)-*N,N*-dimethylaniline (**5a**) [or 4-(2-(3-bromophenyl)-6-(trifluoromethyl)pyrimidin-4-yl)-*N,N*-dimethylaniline (**5b**)] (0.5 mmol, 1.0 equiv.) were dissolved in freshly distilled 1,4-dioxane (10 mL), and argon was bubbled through the solution for 10 min. Then Pd(PPh<sub>3</sub>)<sub>4</sub> (29 mg, 5 mol %) and K<sub>3</sub>PO<sub>4</sub> (318 mg, 1.5 mmol, 2.5 equiv.) were added, and the reaction was refluxed under an argon atmosphere at 120 °C for 10-20 h (monitored by TLC). The reaction mixture was cooled to room temperature, the obtained suspension was filtered through a small plug of SiO<sub>2</sub> (3-4 cm), which was successively washed twice with 1,4-dioxane (2×5 mL), and the obtained filtrate was evaporated under reduced pressure to dryness. The resulting residue was purified by column chromatography (SiO<sub>2</sub>; EtOAc/hexane 1:8) and further crystallized from a minimal amount of EtOAc.

**4'-(4-(4-(Dimethylamino)phenyl)-6-(trifluoromethyl)pyrimidin-2-yl)-*N,N*-diphenyl-[1,1'-biphenyl]-4-amine (7a).** Light yellow solid, 85%, m.p. 236-237 °C; <sup>1</sup>H NMR (500 MHz, CDCl<sub>3</sub>) δ 8.68–8.62 (m, 2H), 8.25–8.18 (m, 2H), 7.77–7.70 (m, 3H), 7.61–7.55 (m, 2H), 7.32–7.23 (m, 4H), 7.19–7.13 (m, 6H), 7.09–7.01 (m, 2H), 6.83 (d, *J* = 8.8 Hz, 2H), 3.10 (s, 6H). <sup>13</sup>C NMR (126 MHz, CDCl<sub>3</sub>) δ 166.0, 164.8, 155.9 (q, *J* = 35.0 Hz), 152.9, 147.7, 147.6, 143.2, 135.6, 134.2, 129.3, 129.1, 128.8, 127.8, 126.6, 124.6, 123.7, 123.12, 123.10, 121.2 (q, *J* = 275.1 Hz), 111.8, 107.9 (d, *J* = 2.9 Hz), 40.1. <sup>19</sup>F NMR (471 MHz, CDCl<sub>3</sub>) δ 91.58. Calcd. for C<sub>37</sub>H<sub>29</sub>F<sub>3</sub>N<sub>4</sub> (586.66): C, 75.75; H, 4.98; N, 9.55. Found: C, 75.72; H, 4.95; N, 9.59.

**4-(2-(4'-(9*H*-Carbazol-9-yl)-[1,1'-biphenyl]-4-yl)-6-(trifluoromethyl)pyrimidin-4-yl)-*N,N*-dimethylaniline (7b).** Light yellow solid, 88%, m.p. 188-189 °C; <sup>1</sup>H NMR (500 MHz, CDCl<sub>3</sub>) δ 8.77–8.72 (m, 2H), 8.28–8.22 (m, 2H), 8.20–8.14 (m, 2H), 7.95–7.90 (m, 2H), 7.88–7.83 (m, 2H), 7.79 (s, 1H), 7.72–7.67 (m, 2H), 7.54–7.48 (m, 2H), 7.48–7.38 (m, 2H), 7.35–7.28 (m, 2H), 7.26 (s, 2H), 6.89–6.84 (m, 2H), 3.12 (s, 6H). <sup>13</sup>C NMR (126 MHz, CDCl<sub>3</sub>) δ 166.1, 164.6, 155.9 (q, *J* = 35.1 Hz), 152.9, 142.7, 140.9, 139.6, 137.3, 136.5, 129.3, 128.9, 128.6, 127.4, 127.2, 126.0, 123.5, 123.0, 121.2 (q, *J* = 275.1 Hz), 120.3, 120.0, 111.8, 109.9, 108.1 (d, *J* = 3.1 Hz), 40.1. <sup>19</sup>F NMR (471 MHz, CDCl<sub>3</sub>) δ 91.61. Calcd. for C<sub>37</sub>H<sub>27</sub>F<sub>3</sub>N<sub>4</sub> (584.65): C, 76.01; H, 4.66; N, 9.58. Found: C, 76.05; H, 4.69; N, 9.55.

**4-(2-(4-(9-Ethyl-9*H*-carbazol-3-yl)phenyl)-6-(trifluoromethyl)pyrimidin-4-yl)-*N,N*-dimethylaniline (7c).** Light yellow solid, 89%, m.p. 192-193 °C; <sup>1</sup>H NMR (400 MHz, CDCl<sub>3</sub>) δ 8.74–8.67 (m, 2H), 8.45–8.39 (m, 1H), 8.28–8.21 (m, 2H), 8.21–8.16 (m, 1H), 7.91–7.84 (m, 2H), 7.86–7.76 (m, 1H), 7.76 (s, 1H), 7.61–7.41 (m, 3H), 7.34–7.23 (m, 1H), 6.87–6.80 (m, 2H), 4.43 (q, *J* = 7.2 Hz, 2H), 3.11 (s, 6H), 1.48 (t, *J* = 7.2 Hz, 3H). <sup>13</sup>C NMR (126 MHz, CDCl<sub>3</sub>) δ 166.0, 165.0, 155.9 (q, *J* = 35.1 Hz), 152.9, 144.8, 140.5, 139.8, 135.2, 131.6, 129.1, 128.8, 127.2, 125.9, 125.2, 123.6, 123.2, 123.1, 121.2 (q, *J* = 275.1 Hz), 120.6, 119.1, 111.8, 108.8, 108.6, 107.9 (q, *J* = 2.8 Hz), 40.1, 37.7, 13.8. (One <sup>13</sup>C signal is missed due to overlapping). <sup>19</sup>F NMR (376 MHz, CDCl<sub>3</sub>) δ 91.61. Calcd. for C<sub>33</sub>H<sub>27</sub>F<sub>3</sub>N<sub>4</sub> (536.60): C, 73.87; H, 5.07; N, 10.44. Found: C, 73.84; H, 5.09; N, 10.40.

**3'-(4-(4-(Dimethylamino)phenyl)-6-(trifluoromethyl)pyrimidin-2-yl)-*N,N*-diphenyl-[1,1'-biphenyl]-4-amine (8a).** White solid, 69%, m.p. 173-174 °C; <sup>1</sup>H NMR (500 MHz, CDCl<sub>3</sub>) δ 8.84–8.79 (m, 1H), 8.58–8.52 (m, 1H), 8.25–8.19 (m, 2H), 7.77 (s, 1H), 7.74–7.69 (m, 1H), 7.64–7.53 (m, 3H), 7.33–7.25 (m, 4H), 7.23–7.13 (m, 6H), 7.08–7.01 (m, 2H), 6.88–6.83 (m, 2H), 3.10 (s, 6H). <sup>13</sup>C NMR (126 MHz, CDCl<sub>3</sub>) δ 166.0, 164.9, 155.9 (q, *J* = 35.1 Hz), 152.9, 147.7, 147.4, 140.9, 137.7, 135.0, 129.4, 129.3, 128.9, 128.8, 128.0, 127.1, 126.8, 124.5, 124.0, 123.0, 122.9, 121.15 (q, *J* = 275.1 Hz), 111.8, 108.2 (d, *J* = 3.0 Hz), 40.1. <sup>19</sup>F NMR (471 MHz, CDCl<sub>3</sub>) δ 91.65. Calcd. for C<sub>37</sub>H<sub>29</sub>F<sub>3</sub>N<sub>4</sub> (586.66): C, 75.75; H, 4.98; N, 9.55. Found: C, 75.77; H, 4.94; N, 9.59.

**4-(2-(4'-(9*H*-Carbazol-9-yl)-[1,1'-biphenyl]-3-yl)-6-(trifluoromethyl)pyrimidin-4-yl)-*N,N*-dimethylaniline (8b).** Light yellow solid, 64%, m.p. 254-255 °C; <sup>1</sup>H NMR (500 MHz, CDCl<sub>3</sub>) δ 8.96–8.91 (m, 1H), 8.69–8.63 (m, 1H), 8.27–8.22 (m, 2H), 8.20–8.14 (m, 2H), 7.99–7.92 (m, 2H), 7.87–7.83 (m, 1H), 7.81 (s, 1H), 7.74–7.69 (m, 2H), 7.68–7.62 (m, 1H), 7.55–7.49 (m, 2H), 7.49–7.41 (m, 2H), 7.35–7.28 (m, 2H), 6.88–6.83 (m, 2H), 3.11 (s, 6H). <sup>13</sup>C NMR (126 MHz, CDCl<sub>3</sub>) δ 166.1, 164.8, 155.9 (q, *J* = 34.9 Hz), 152.9, 140.9, 140.6, 140.1, 137.9, 137.0, 129.8, 129.1, 128.8, 128.7, 127.9, 127.4, 127.3, 125.9, 123.4, 122.9, 121.1 (q, *J* = 275.1 Hz), 120.3, 119.9, 111.8, 109.9, 108.3 (q, *J* = 2.9 Hz),

40.1.  $^{19}\text{F}$  NMR (471 MHz,  $\text{CDCl}_3$ )  $\delta$  91.81. Calcd. for  $\text{C}_{37}\text{H}_{27}\text{F}_3\text{N}_4$  (584.65): C, 76.01; H, 4.66; N, 9.58. Found: C, 76.05; H, 4.64; N, 9.56.

**4-(2-(3-(9-Ethyl-9H-carbazol-3-yl)phenyl)-6-(trifluoromethyl)pyrimidin-4-yl)-N,N-dimethylaniline (8c).** Light yellow solid, 66%, m.p. 199–200 °C;  $^1\text{H}$  NMR (500 MHz,  $\text{CDCl}_3$ )  $\delta$  8.93 (m, 1H), 8.61–8.55 (m, 1H), 8.45–8.40 (m, 1H), 8.26–8.21 (m, 2H), 8.21–8.19 (m, 1H), 7.89–7.82 (m, 2H), 7.79 (s, 1H), 7.66–7.59 (m, 1H), 7.56–7.51 (m, 1H), 7.50–7.48 (m, 1H), 7.48–7.42 (m, 1H), 7.30–7.23 (m, 1H), 6.85–6.79 (m, 2H), 4.43 (q,  $J = 7.2$  Hz, 2H), 3.10 (s, 6H), 1.49 (t,  $J = 7.2$  Hz, 3H).  $^{13}\text{C}$  NMR (126 MHz,  $\text{CDCl}_3$ )  $\delta$  165.7, 165.2, 156.1 (q,  $J = 36.3$  Hz), 142.6, 140.4, 139.5, 137.4, 132.1, 130.3, 129.0, 127.46, 126.8, 125.8, 125.4, 123.5, 123.1, 121.1 (q,  $J = 275.3$  Hz), 120.6, 119.2, 118.9, 113.5 (br.), 108.7, 108.6, 108.5 (br.), 41.2, 37.7, 13.8. (Three  $^{13}\text{C}$  signals are missed due to overlapping).  $^{19}\text{F}$  NMR (471 MHz,  $\text{CDCl}_3$ )  $\delta$  91.69. Calcd. for  $\text{C}_{33}\text{H}_{27}\text{F}_3\text{N}_4$  (536.60): C, 73.87; H, 5.07; N, 10.44. Found: C, 73.88; H, 5.05; N, 10.48.

**General procedure for the Suzuki cross-coupling reactions for the synthesis of compounds (9a-c):** (Het)arylboronic acid pinacol ester (1.2 mmol, 2.4 equiv.) and 4-(2-(3,5-dibromophenyl)-6-(trifluoromethyl)pyrimidin-4-yl)-N,N-dimethylaniline (5c) (251 mg, 0.5 mmol, 1.0 equiv.) (1.0 eq.) were dissolved in freshly distilled 1,4-dioxane (10 mL), and argon was bubbled through the solution for 10 min. Then  $\text{Pd}(\text{PPh}_3)_4$  (58 mg, 10 mol %) and  $\text{K}_3\text{PO}_4$  (636 mg, 3.0 mmol, 5.0 equiv.) were added, and the reaction was refluxed under an argon atmosphere at 120 °C for 10–20 h (monitored by TLC). The reaction mixture was cooled to room temperature, the obtained suspension was filtered through a small plug of  $\text{SiO}_2$  (3–4 cm), which was successively washed twice with 1,4-dioxane (2  $\times$  7 ml) and  $\text{CHCl}_3$  (2  $\times$  7 ml), and the obtained filtrate was evaporated under reduced pressure to dryness. The resulting residue was crystallized twice from THF.

**5'-(4-(4-(Dimethylamino)phenyl)-6-(trifluoromethyl)pyrimidin-2-yl)-N4,N4,N4'',N4''-tetraphenyl-[1,1':3',1''-terphenyl]-4,4''-diamine (9a).** Light yellow solid, 69%, m.p. 279–280 °C;  $^1\text{H}$  NMR (500 MHz,  $\text{CDCl}_3$ )  $\delta$  8.78–8.73 (m, 2H), 8.26–8.20 (m, 2H), 7.94–7.89 (m, 1H), 7.79 (s, 1H), 7.69–7.62 (m, 4H), 7.33–7.25 (m, 8H), 7.24–7.14 (m, 12H), 7.09–7.01 (m, 4H), 6.88–6.82 (m, 2H), 3.10 (s, 6H).  $^{13}\text{C}$  NMR (151 MHz,  $\text{CDCl}_3$ )  $\delta$  166.0, 164.9, 155.9 (q,  $J = 35.1$  Hz), 152.9, 147.7, 147.4, 141.5, 138.2, 135.0, 129.3, 128.9, 128.1, 127.9, 125.5, 124.5, 124.0, 123.0, 122.9, 121.2 (q,  $J = 275.4$  Hz), 111.8, 108.3, 40.12.  $^{19}\text{F}$  NMR (471 MHz,  $\text{CDCl}_3$ )  $\delta$  91.71. Calcd. for  $\text{C}_{55}\text{H}_{42}\text{F}_3\text{N}_5$  (829.97): C, 79.59; H, 5.10; N, 8.44. Found: C, 79.56; H, 5.13; N, 8.42.

**4-(2-(4,4''-Di(9H-carbazol-9-yl)-[1,1':3',1''-terphenyl]-5'-yl)-6-(trifluoromethyl)pyrimidin-4-yl)-N,N-dimethylaniline (9b).** Light yellow solid, 78%, m.p. 312–313 °C;  $^1\text{H}$  NMR (500 MHz,  $\text{CDCl}_3$ )  $\delta$  9.00–8.96 (m, 2H), 8.32–8.26 (m, 2H), 8.21–8.17 (m, 4H), 8.17–8.15 (m, 1H), 8.08–8.03 (m, 4H), 7.86 (s, 1H), 7.78–7.73 (m, 4H), 7.58–7.52 (m, 4H), 7.50–7.43 (m, 4H), 7.36–7.29 (m, 4H), 6.93–6.88 (m, 2H), 3.12 (s, 6H).  $^{13}\text{C}$  NMR (151 MHz,  $\text{CDCl}_3$ )  $\delta$  166.2, 164.6, 156.0 (q,  $J = 35.1$  Hz), 153.0, 141.4, 140.9, 140.0, 138.7, 137.3, 129.0, 128.9, 128.7, 127.5, 126.6, 126.0, 123.5, 122.8, 121.2 (q,  $J = 275.2$  Hz), 120.4, 120.1, 111.8, 109.9, 108.6 (d,  $J = 3.2$  Hz), 40.2.  $^{19}\text{F}$  NMR (471 MHz,  $\text{CDCl}_3$ )  $\delta$  91.96. Calcd. for  $\text{C}_{55}\text{H}_{38}\text{F}_3\text{N}_5$  (825.94): C, 79.98; H, 4.64; N, 8.48. Found: C, 79.97; H, 4.62; N, 8.51.

**4-(2-(3,5-Bis(9-ethyl-9H-carbazol-3-yl)phenyl)-6-(trifluoromethyl)pyrimidin-4-yl)-N,N-dimethylaniline (9c).** Light yellow solid, 71%, m.p. 297–298 °C;  $^1\text{H}$  NMR (600 MHz,  $\text{CDCl}_3$ )  $\delta$  8.94 (d,  $J = 1.8$  Hz, 2H), 8.56 (d,  $J = 1.8$  Hz, 2H), 8.27 (t,  $J = 8.4$  Hz, 4H), 8.22 (t,  $J = 1.8$  Hz, 1H), 7.98 (dd,  $J = 8.4, 1.8$  Hz, 2H), 7.84 (s, 1H), 7.59 (d,  $J = 8.4$  Hz, 2H), 7.57–7.51 (m, 2H), 7.49 (d,  $J = 8.2$  Hz, 2H), 7.33–7.28 (m, 2H), 6.86–6.81 (m, 2H), 4.47 (q,  $J = 7.3$  Hz, 4H), 3.11 (s, 6H), 1.53 (t,  $J = 7.2$  Hz, 6H).  $^{13}\text{C}$  NMR (151 MHz,  $\text{CDCl}_3$ )  $\delta$  166.0, 165.3, 155.9 (q,  $J = 34.9$  Hz), 152.9, 143.1, 140.5, 139.6, 138.2, 132.4, 129.4, 128.9, 125.84, 125.80, 125.6, 123.5, 123.2, 123.0, 121.3 (q,  $J = 275.2$  Hz), 120.7, 119.4, 119.0, 111.8, 108.7, 108.6, 108.2, 40.1, 37.7, 13.9.  $^{19}\text{F}$  NMR (376 MHz,  $\text{CDCl}_3$ )  $\delta$  91.80. Calcd. for  $\text{C}_{47}\text{H}_{38}\text{F}_3\text{N}_5$  (729.85): C, 77.35; H, 5.25; N, 9.60. Found: C, 77.38; H, 5.23; N, 9.64.

### NMR Spectra of push-pull systems

The  $^1\text{H}$  and  $^{13}\text{C}$  NMR spectra were recorded on a Bruker DRX-400, AVANCE-500 and AVANCE-600 instruments using  $\text{Me}_4\text{Si}$  as an internal standard. Elemental analysis was carried on a Eurovector EA 3000 automated analyzer. High resolution mass spectrometry was performed using a Bruker maXis Impact HD spectrometer. Melting points were determined on Boetius combined heating stages and were not corrected.

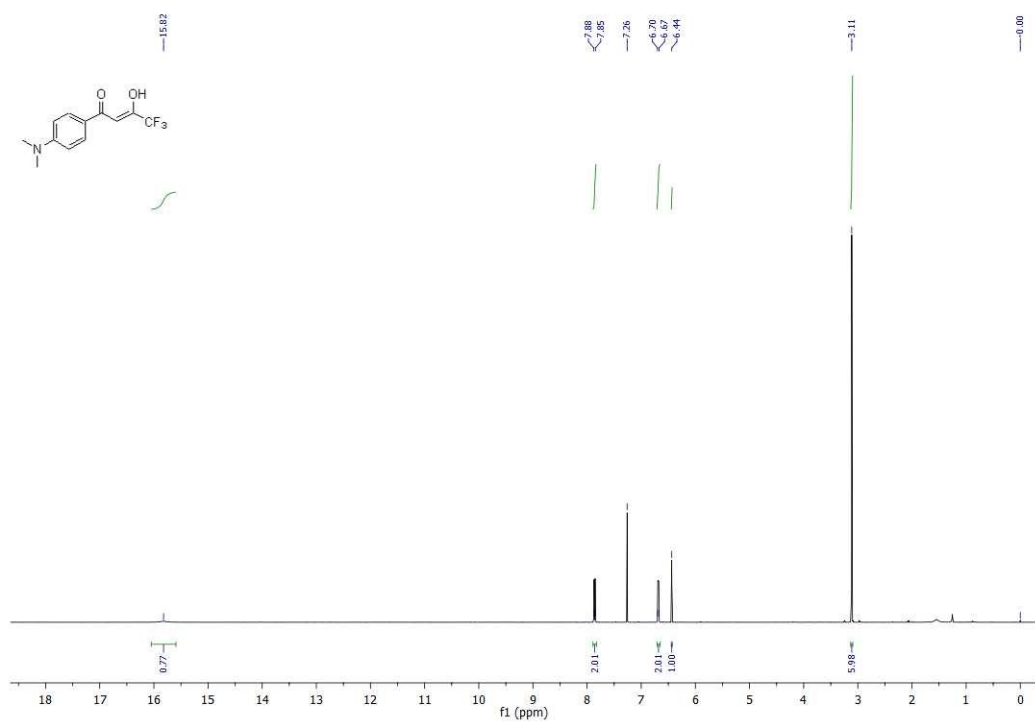

**Figure S1.** <sup>1</sup>H NMR (500 MHz, CDCl<sub>3</sub>) spectrum of **3**

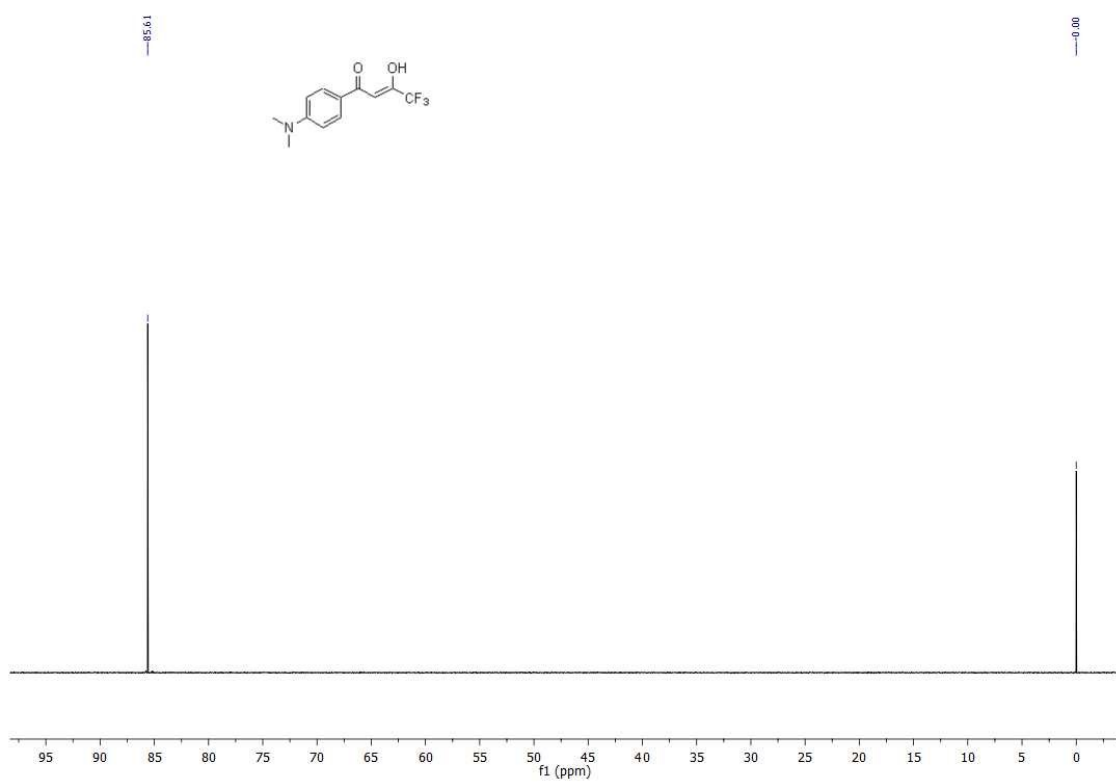

**Figure S2.** <sup>19</sup>F NMR (471 MHz, CDCl<sub>3</sub>) spectrum of **3**

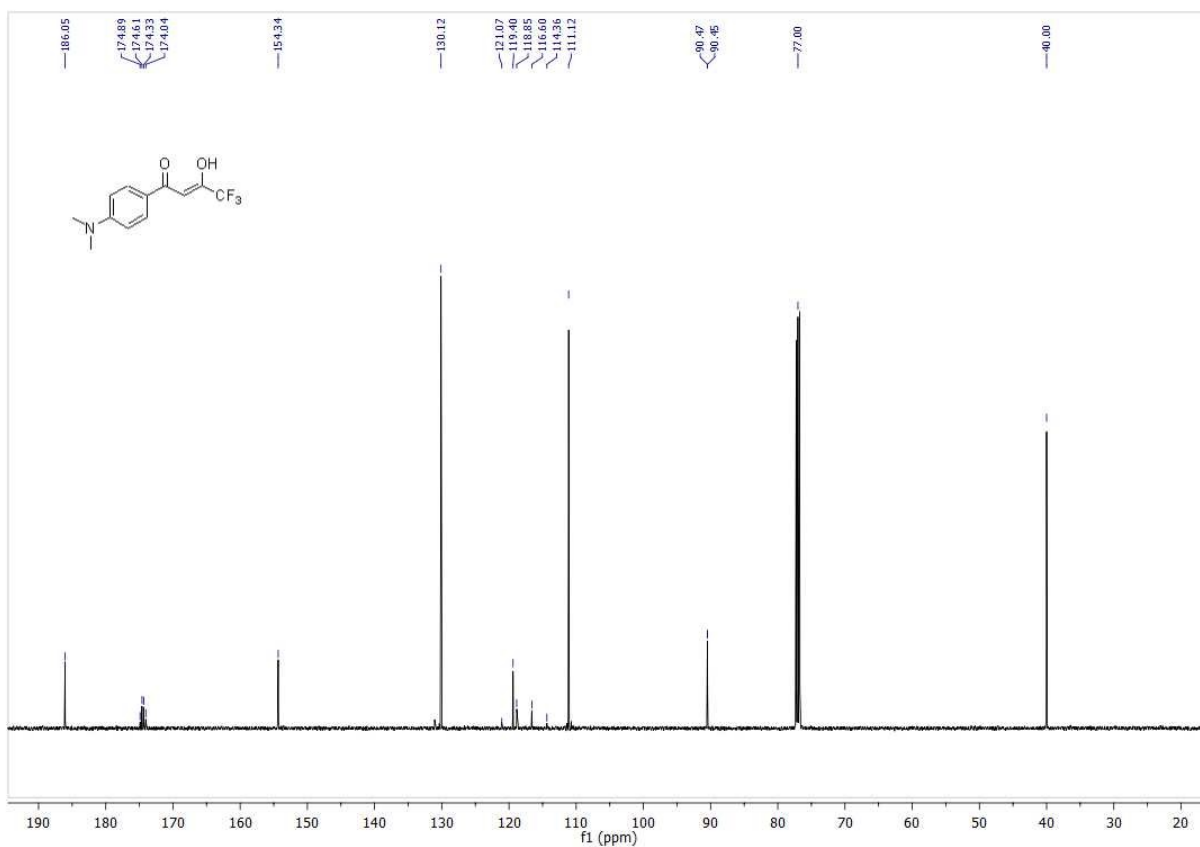

**Figure S3.** <sup>13</sup>C NMR (126 MHz, CDCl<sub>3</sub>) spectrum of 3

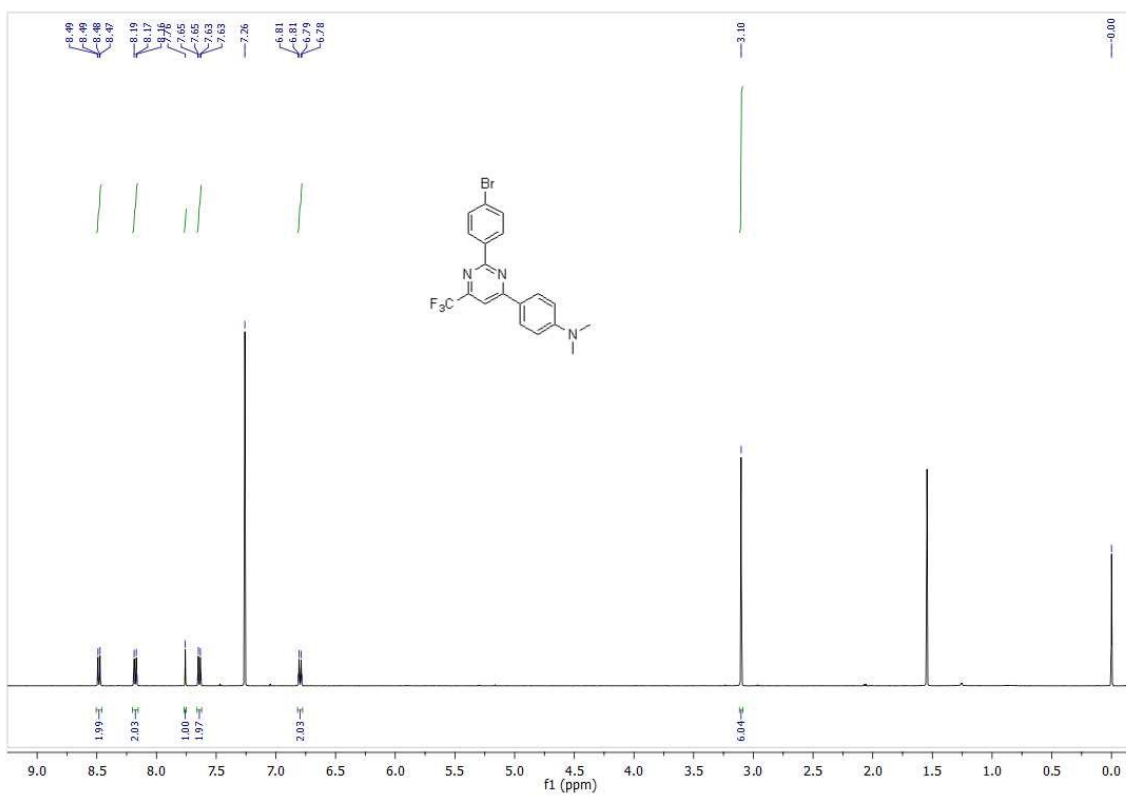

**Figure S4.** <sup>1</sup>H NMR (500 MHz, CDCl<sub>3</sub>) spectrum of 5a

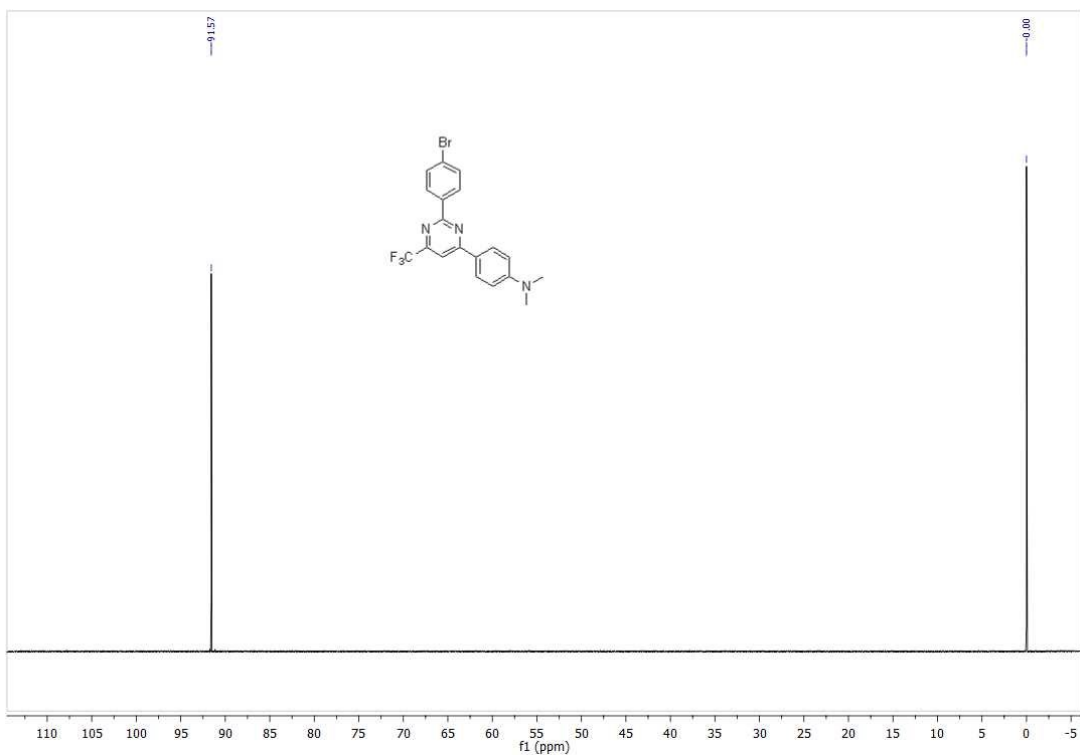

**Figure S5.** <sup>19</sup>F NMR (471 MHz, CDCl<sub>3</sub>) spectrum of 5a

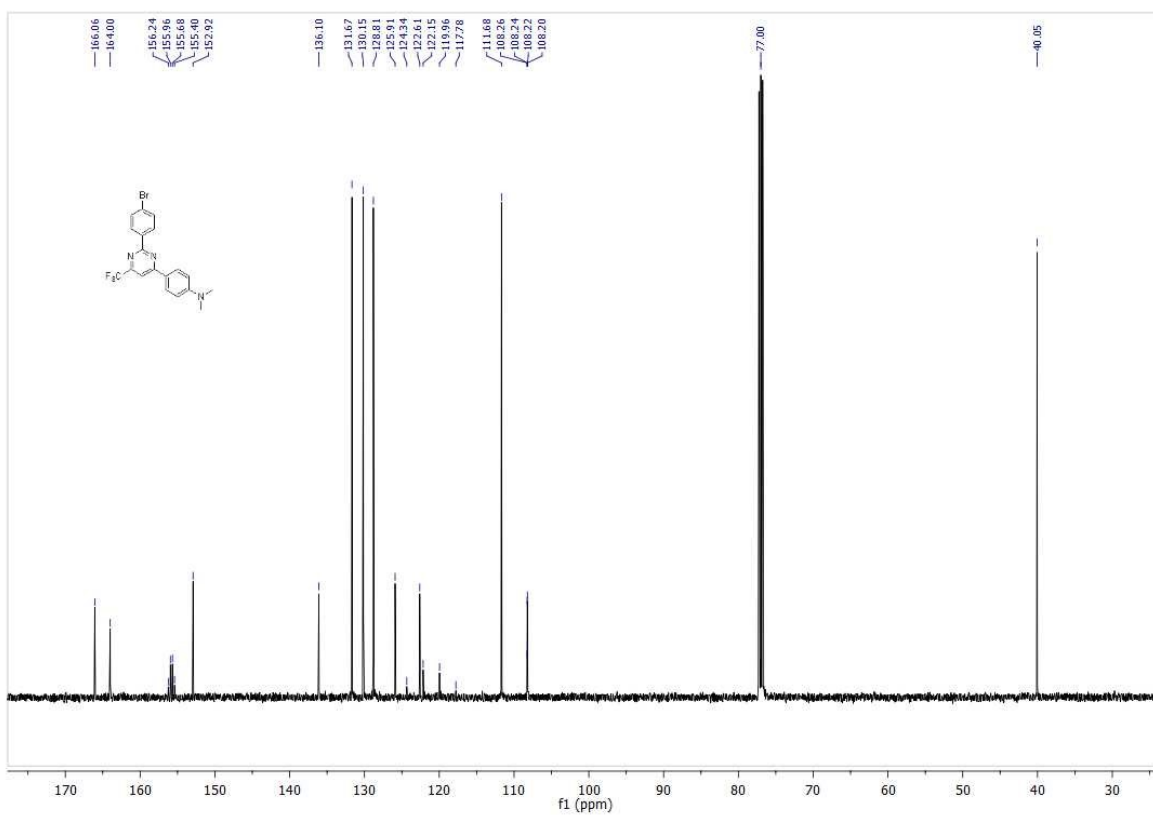

**Figure S6.** <sup>13</sup>C NMR (126 MHz, CDCl<sub>3</sub>) spectrum of 5a

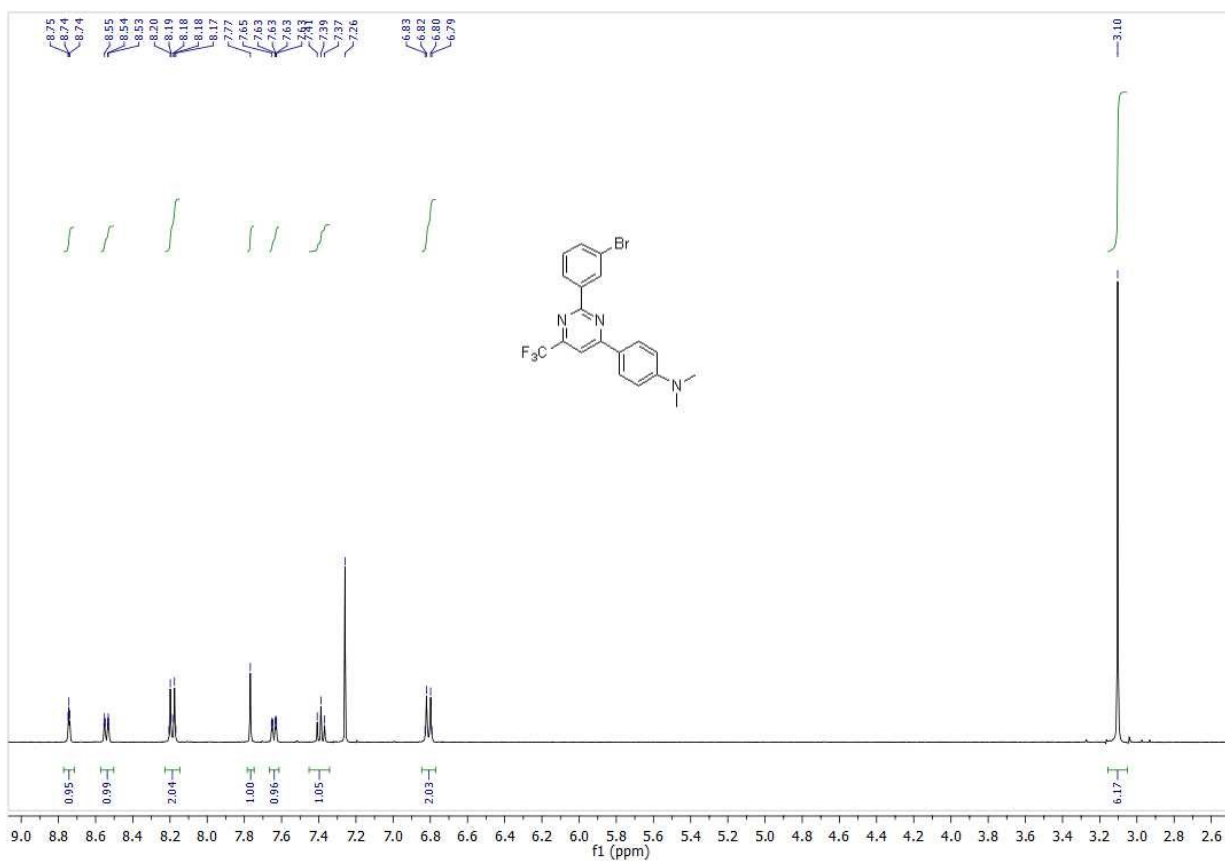

**Figure S7.**  $^1\text{H}$  NMR (500 MHz,  $\text{CDCl}_3$ ) spectrum of **5b**

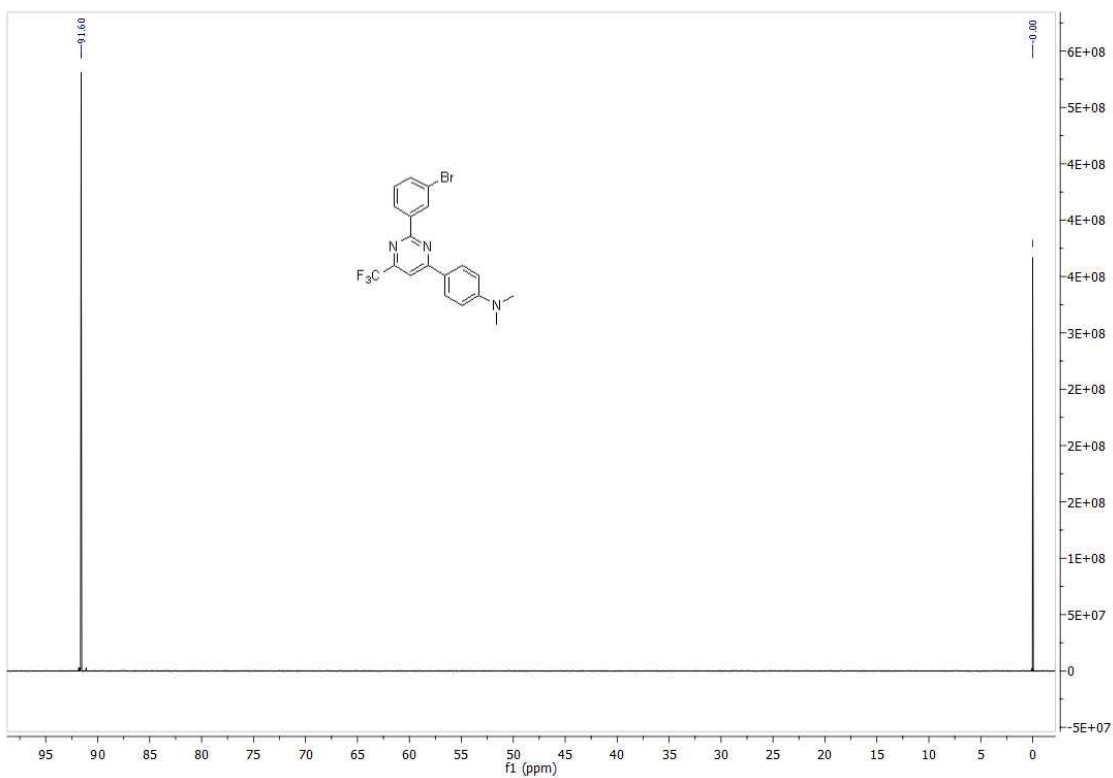

**Figure S8.**  $^{19}\text{F}$  NMR (471 MHz,  $\text{CDCl}_3$ ) spectrum of **5b**

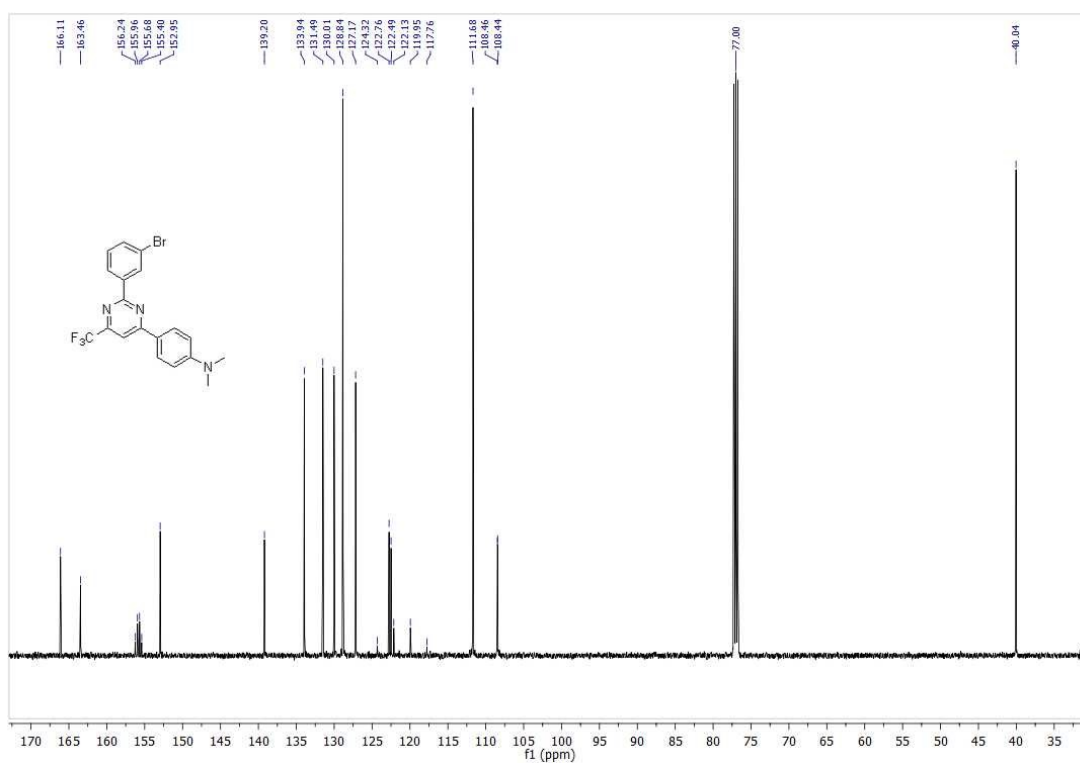

**Figure S9.** <sup>13</sup>C NMR (126 MHz, CDCl<sub>3</sub>) spectrum of **5b**

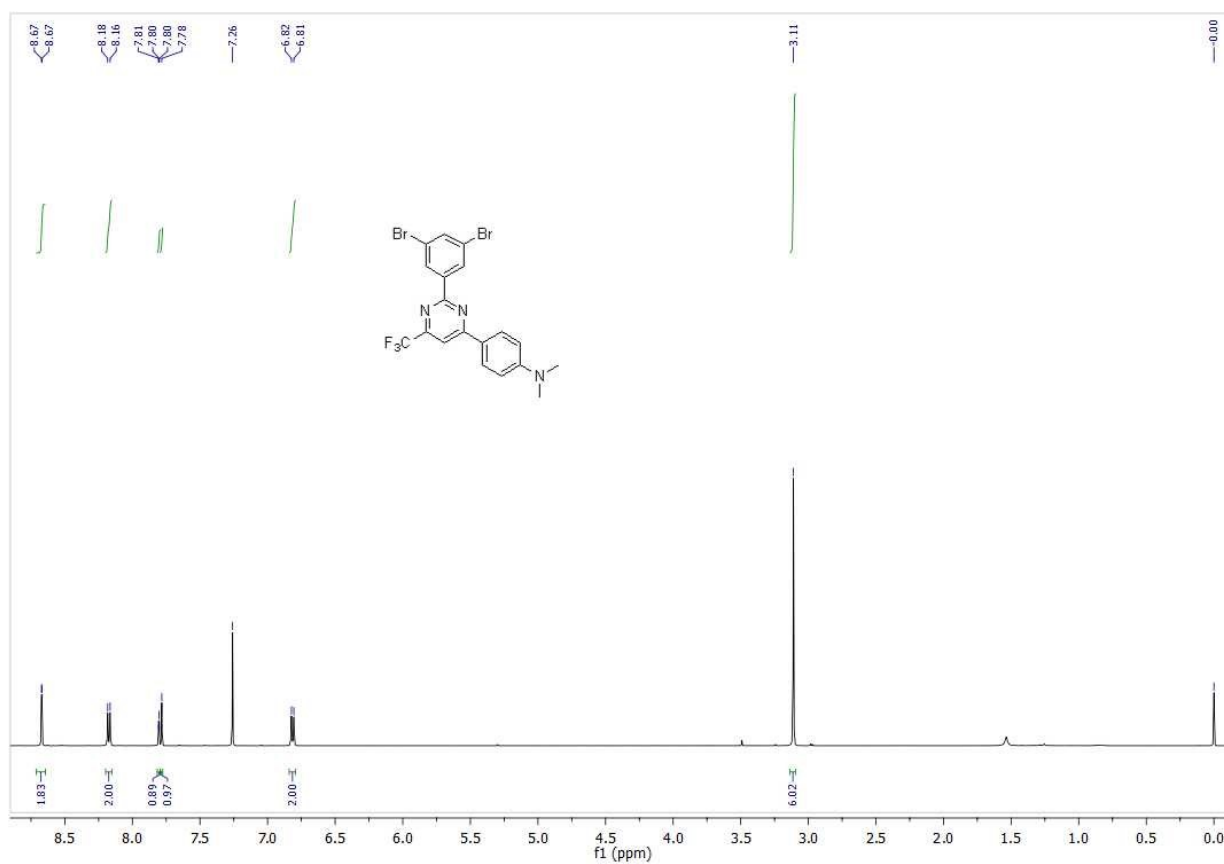

**Figure S10.** <sup>1</sup>H NMR (500 MHz, CDCl<sub>3</sub>) spectrum of **5c**

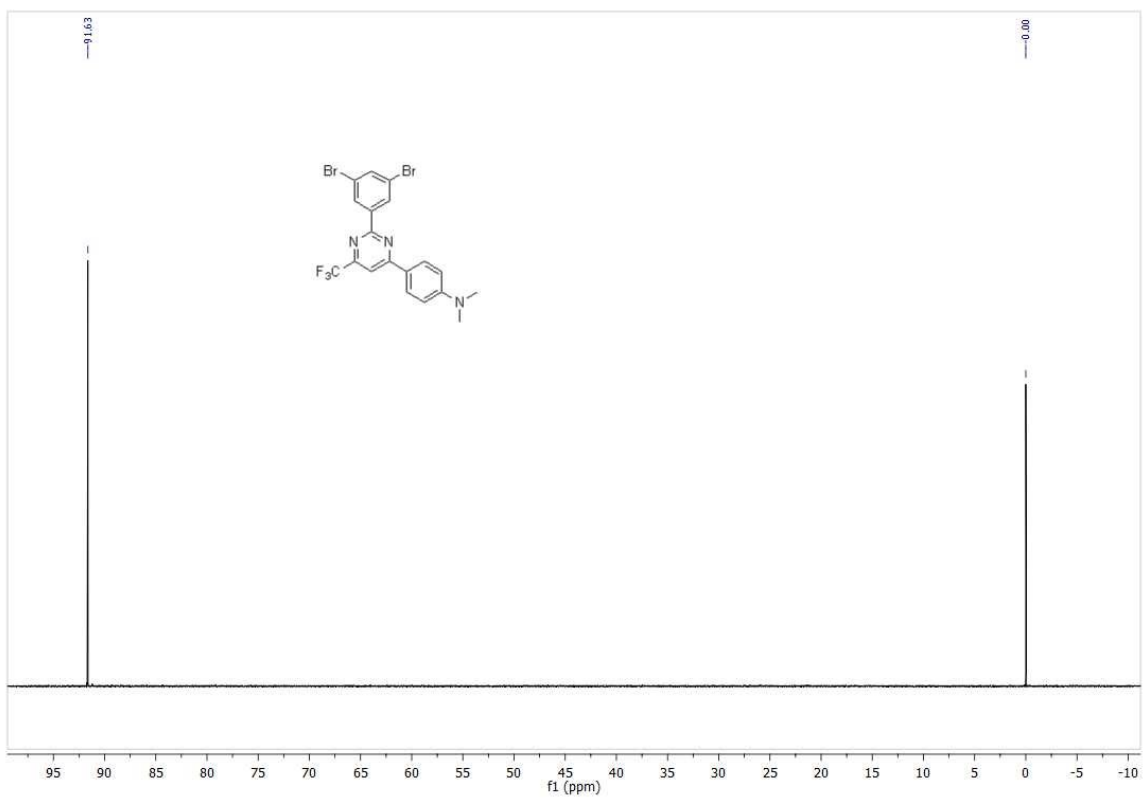

**Figure S11.** <sup>19</sup>F NMR (471 MHz, CDCl<sub>3</sub>) spectrum of 5c

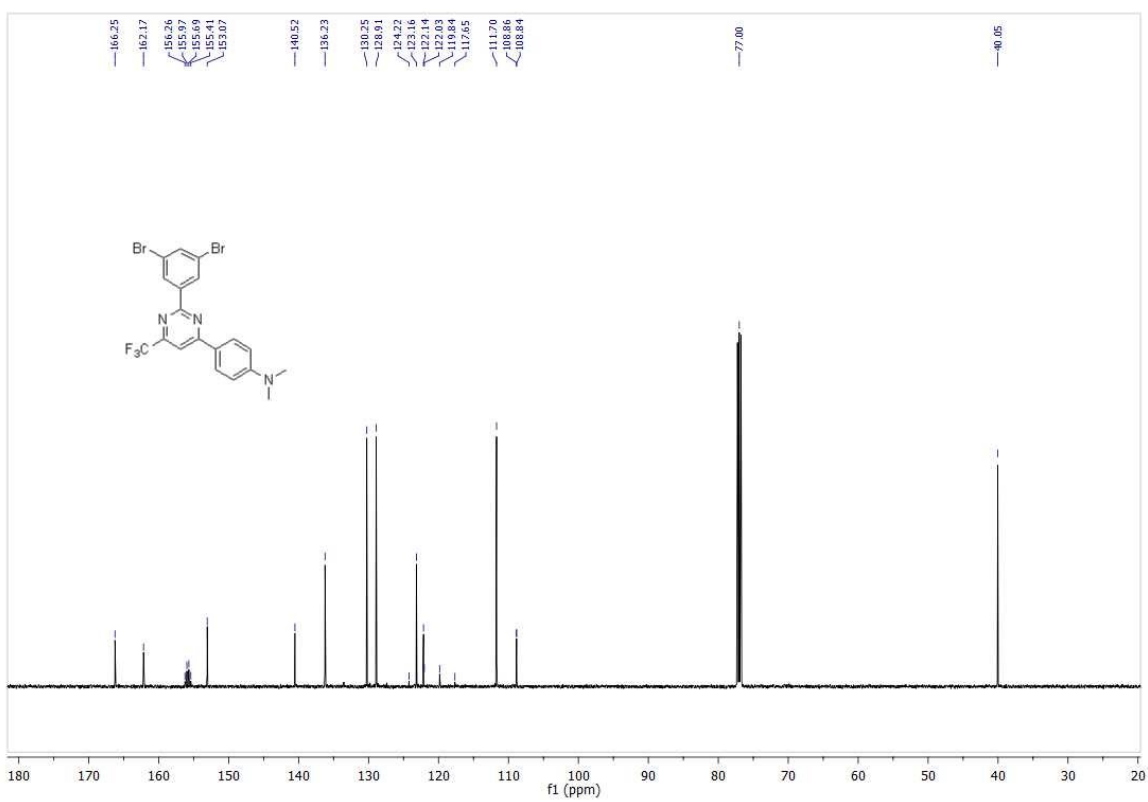

**Figure S12.** <sup>13</sup>C NMR (126 MHz, CDCl<sub>3</sub>) spectrum of 5c

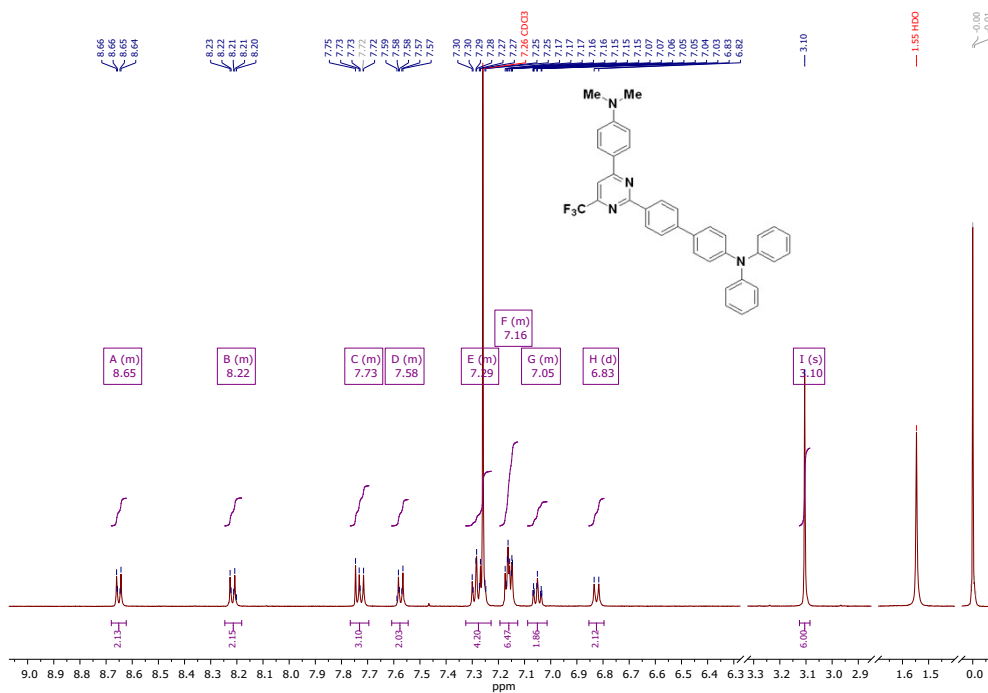

Figure S13.  $^1\text{H}$  NMR (500 MHz,  $\text{CDCl}_3$ ) spectrum of 7a

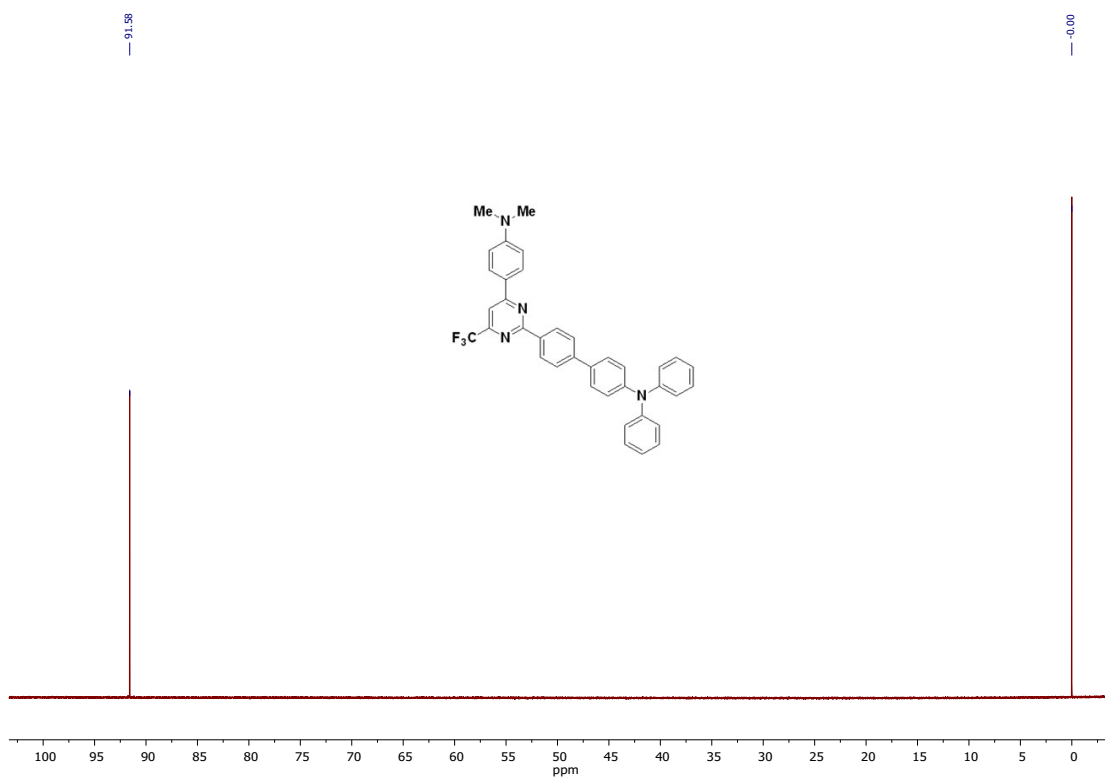

Figure S14.  $^{19}\text{F}$  NMR (471 MHz,  $\text{CDCl}_3$ ) spectrum of 7a

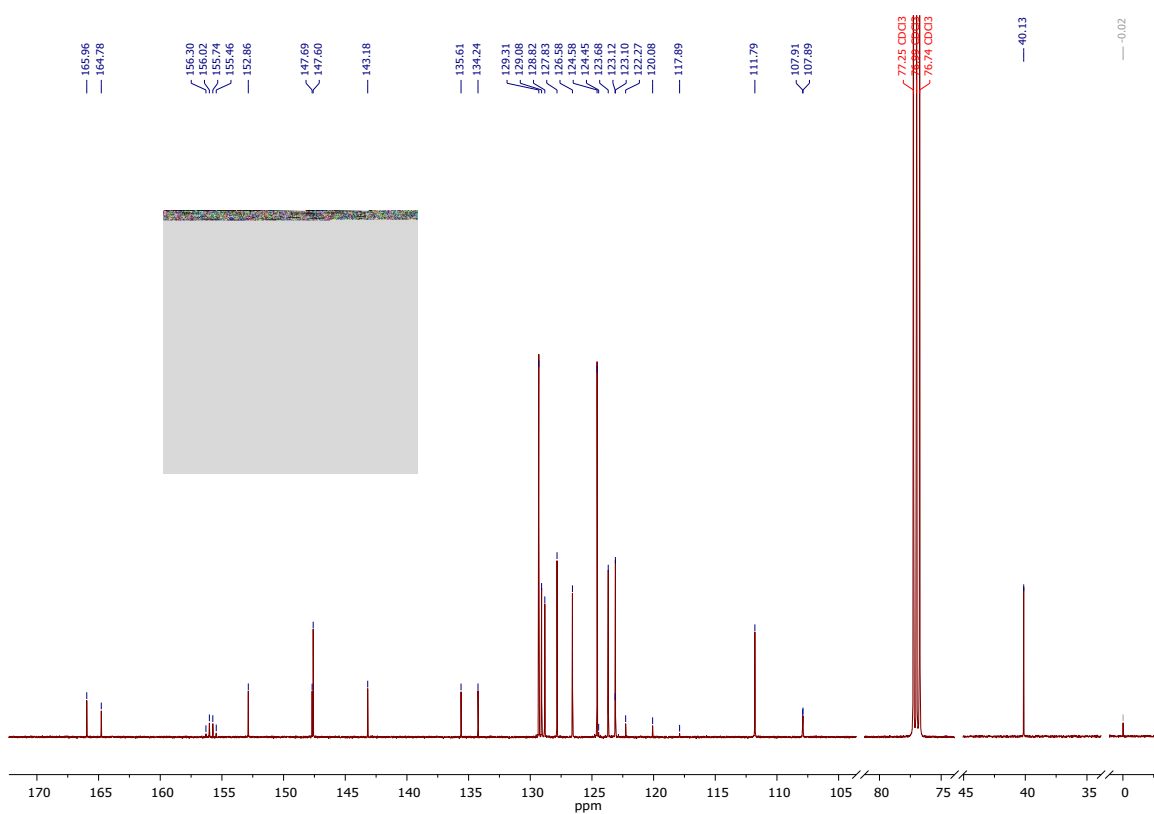

Figure S15. <sup>13</sup>C NMR (126 MHz, CDCl<sub>3</sub>) spectrum of 7a

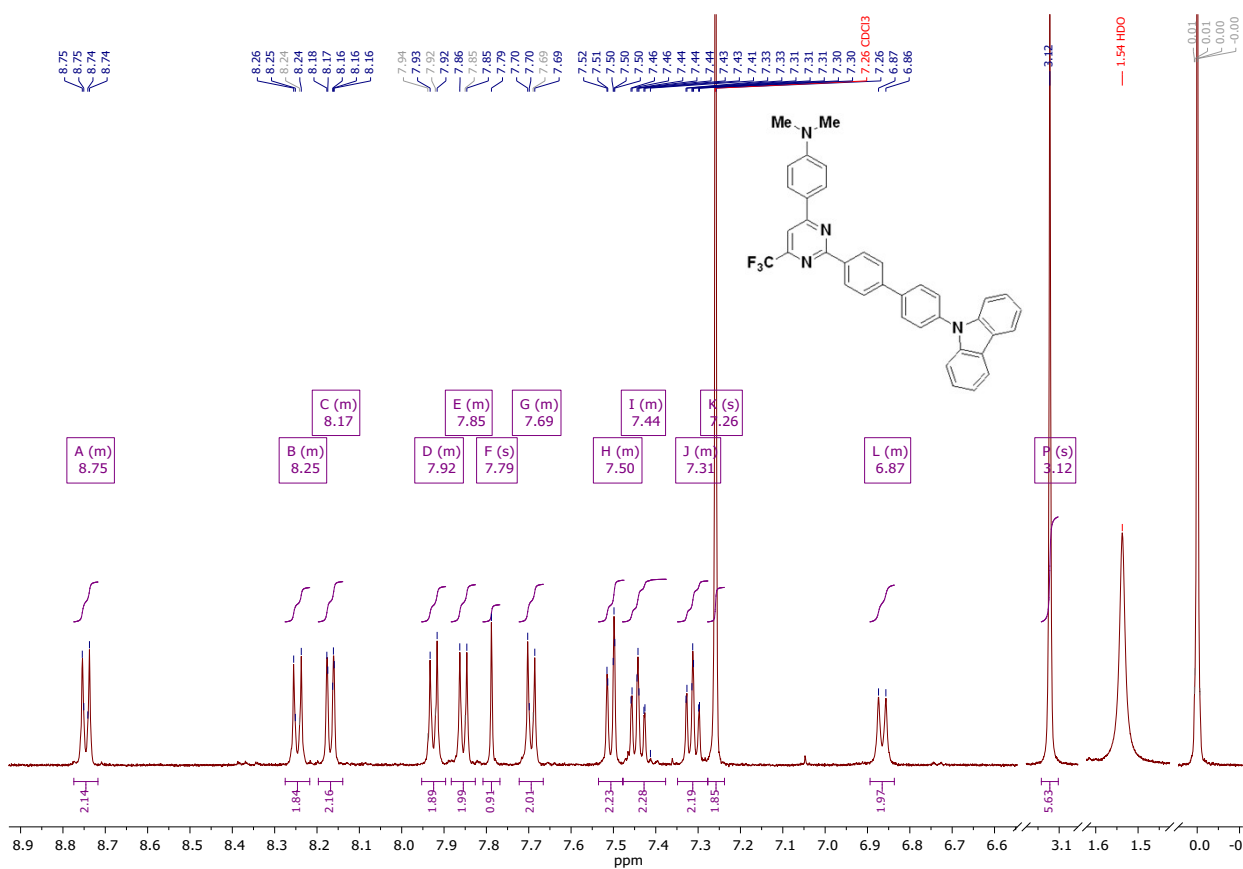

Figure S16. <sup>1</sup>H NMR (500 MHz, CDCl<sub>3</sub>) spectrum of 7b

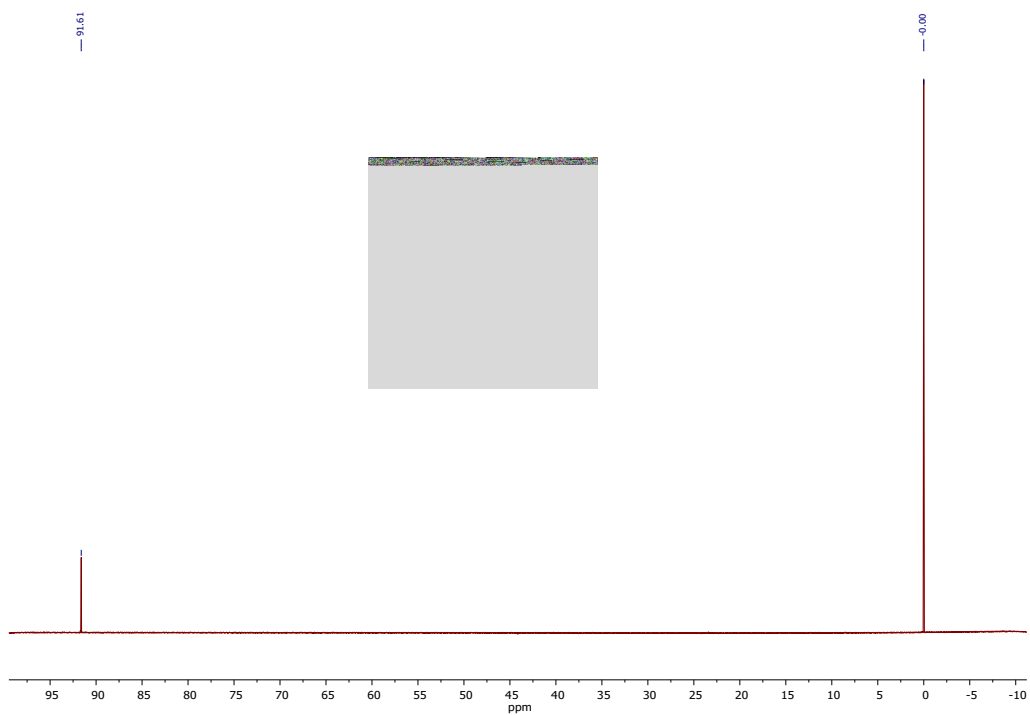

**Figure S17.**  $^{19}\text{F}$  NMR (471 MHz,  $\text{CDCl}_3$ ) spectrum of **7b**

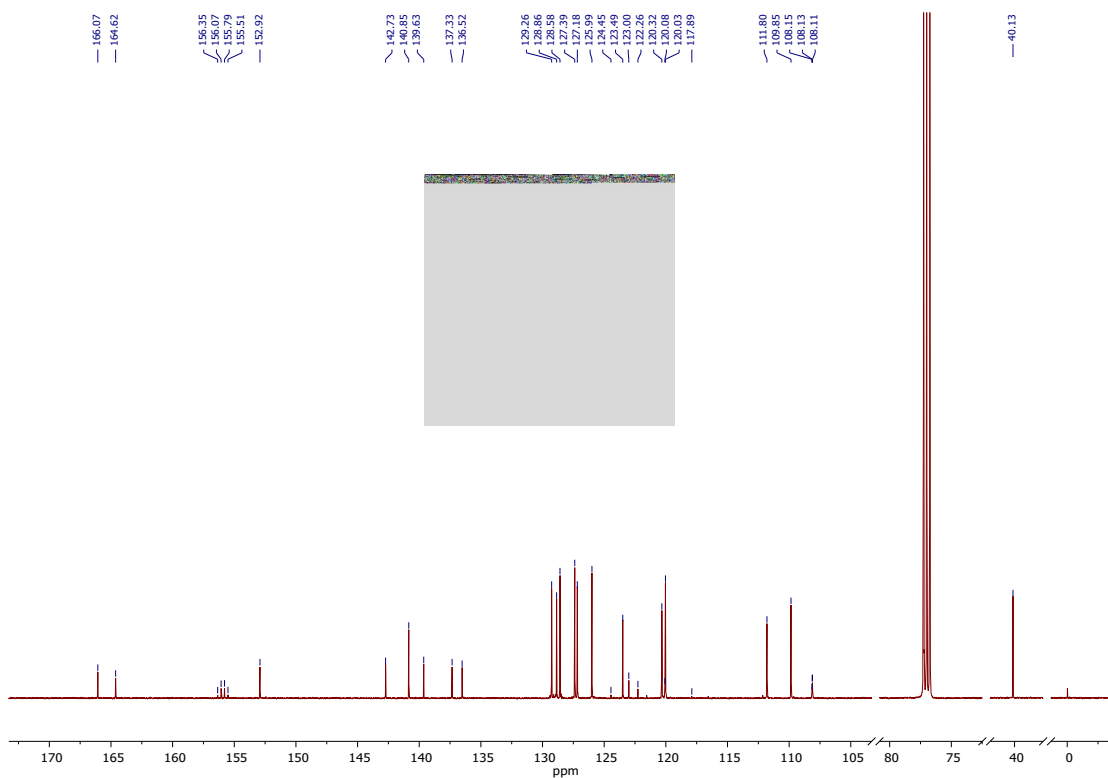

**Figure S18.**  $^{13}\text{C}$  NMR (126 MHz,  $\text{CDCl}_3$ ) spectrum of **7b**

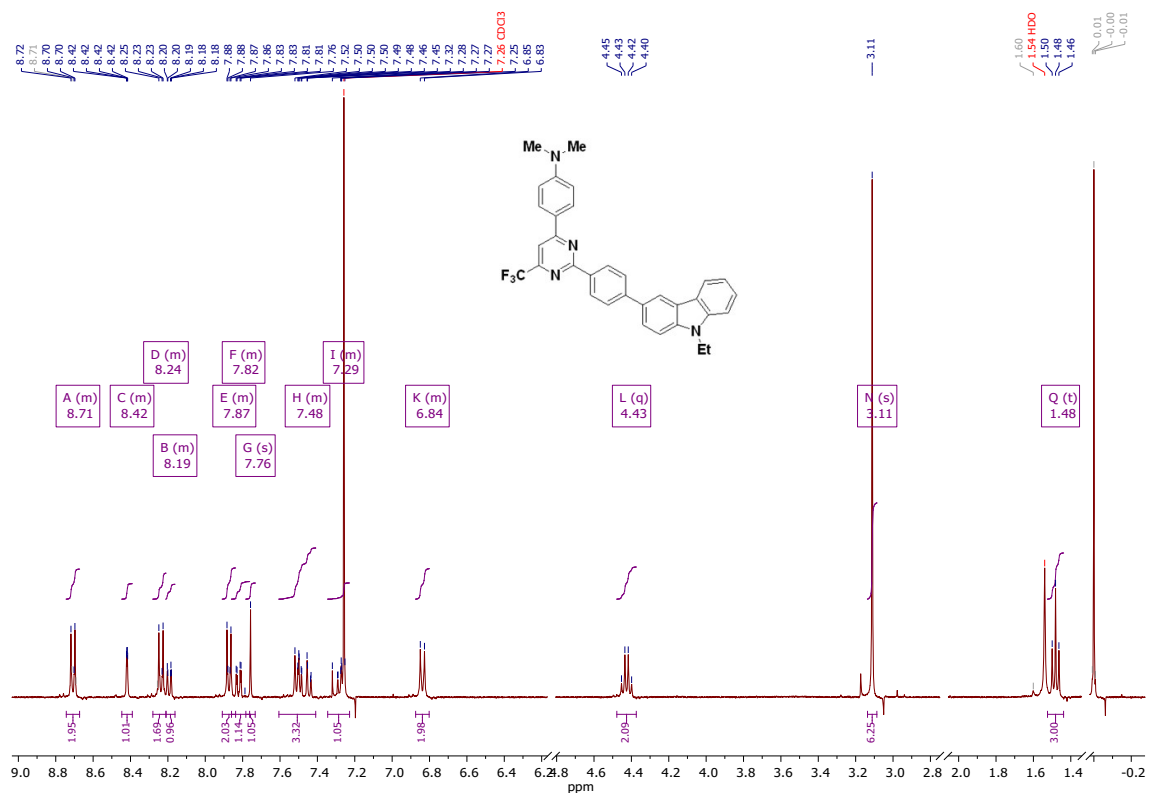

**Figure S19.**  $^1\text{H}$  NMR (400 MHz,  $\text{CDCl}_3$ ) spectrum of **7c**

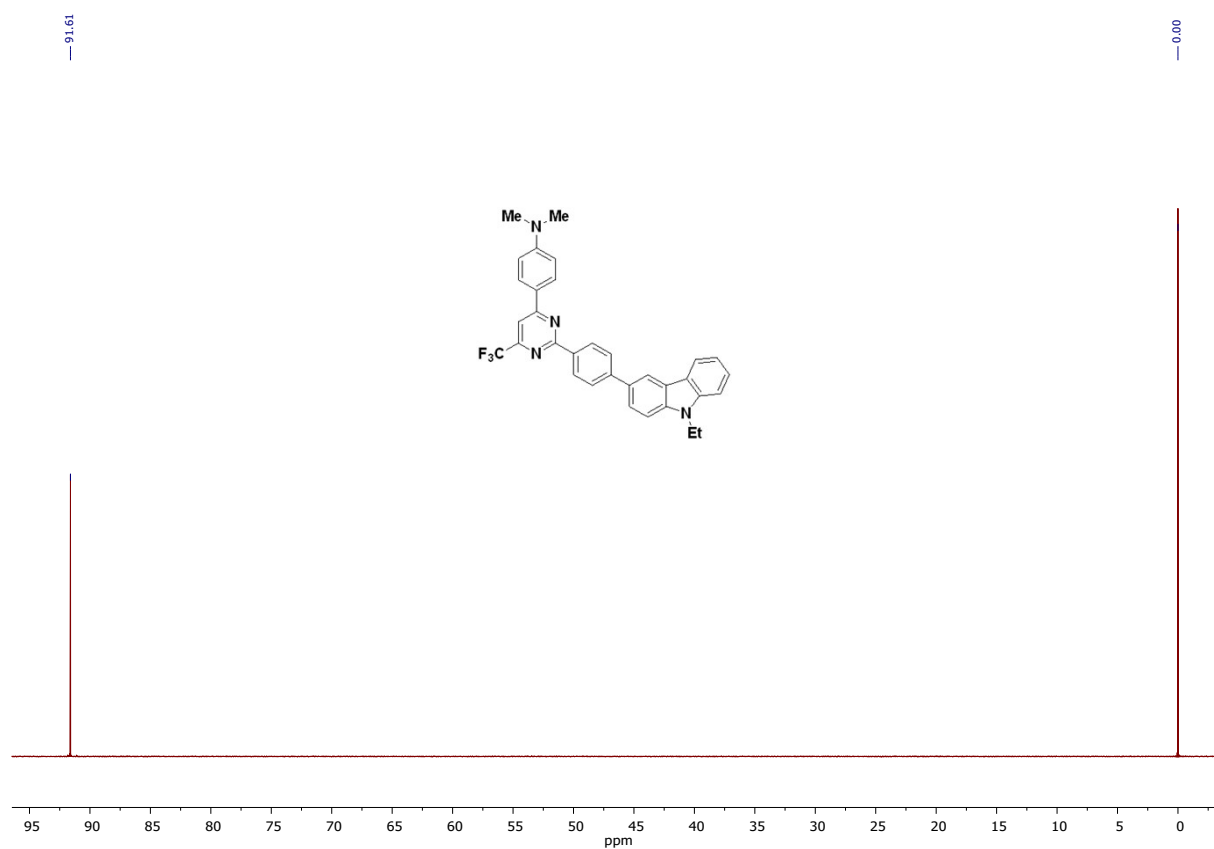

**Figure S20.**  $^{19}\text{F}$  NMR (471 MHz,  $\text{CDCl}_3$ ) spectrum of **7c**

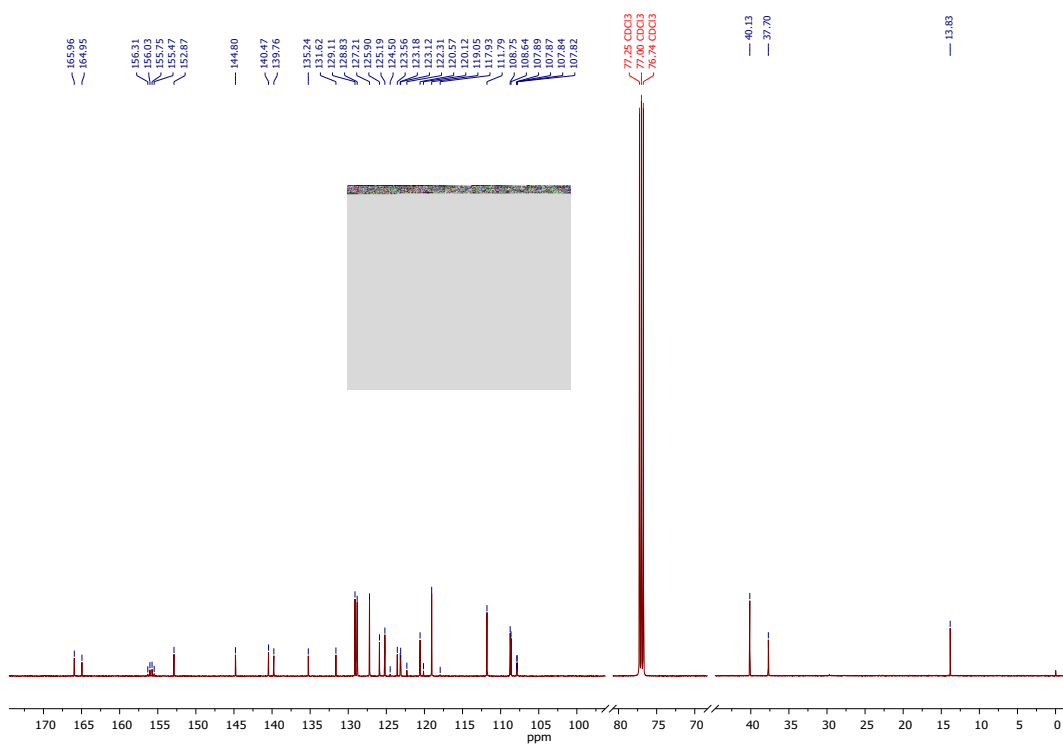

Figure S21.  $^{13}\text{C}$  NMR (126 MHz,  $\text{CDCl}_3$ ) spectrum of **7c**

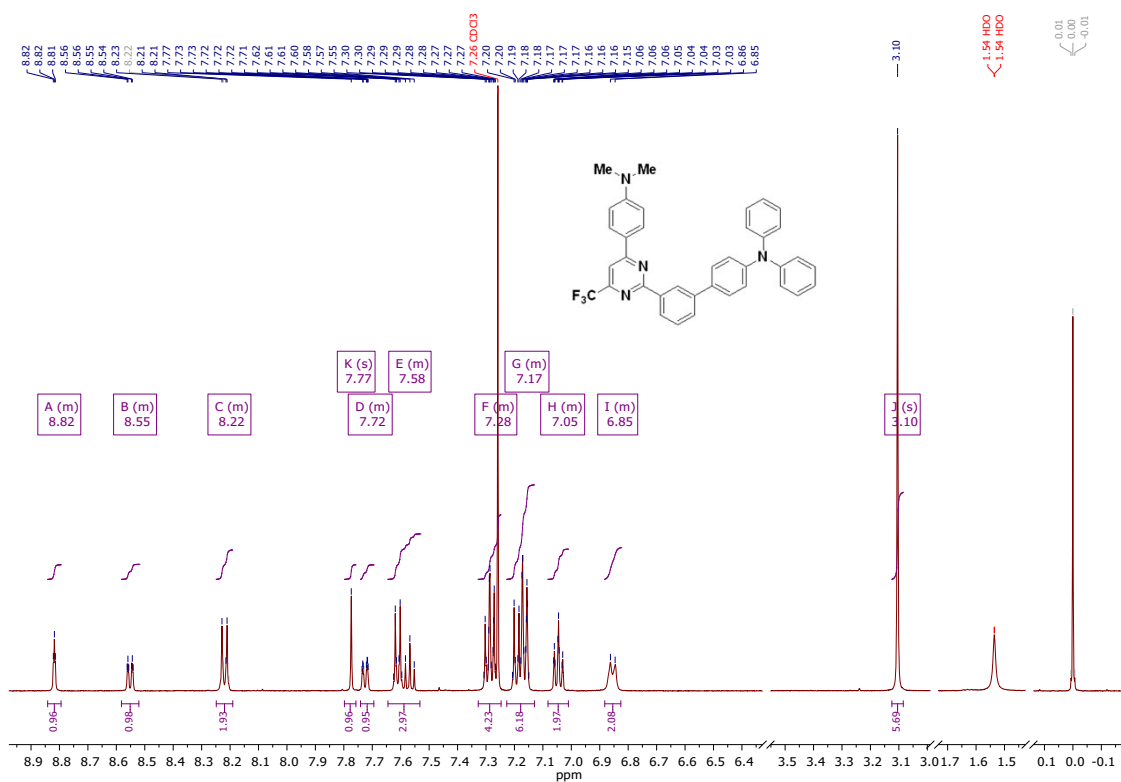

Figure S22.  $^1\text{H}$  NMR (500 MHz,  $\text{CDCl}_3$ ) spectrum of **8a**

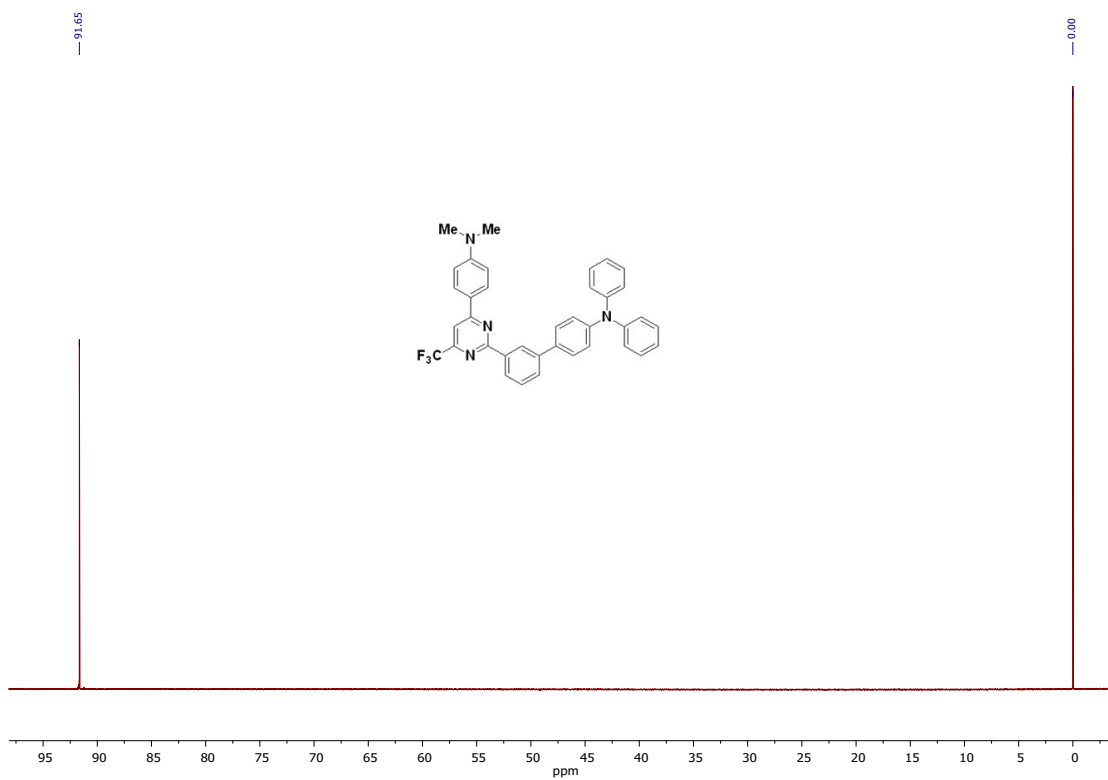

Figure S23. <sup>19</sup>F NMR (471 MHz, CDCl<sub>3</sub>) spectrum of 8a

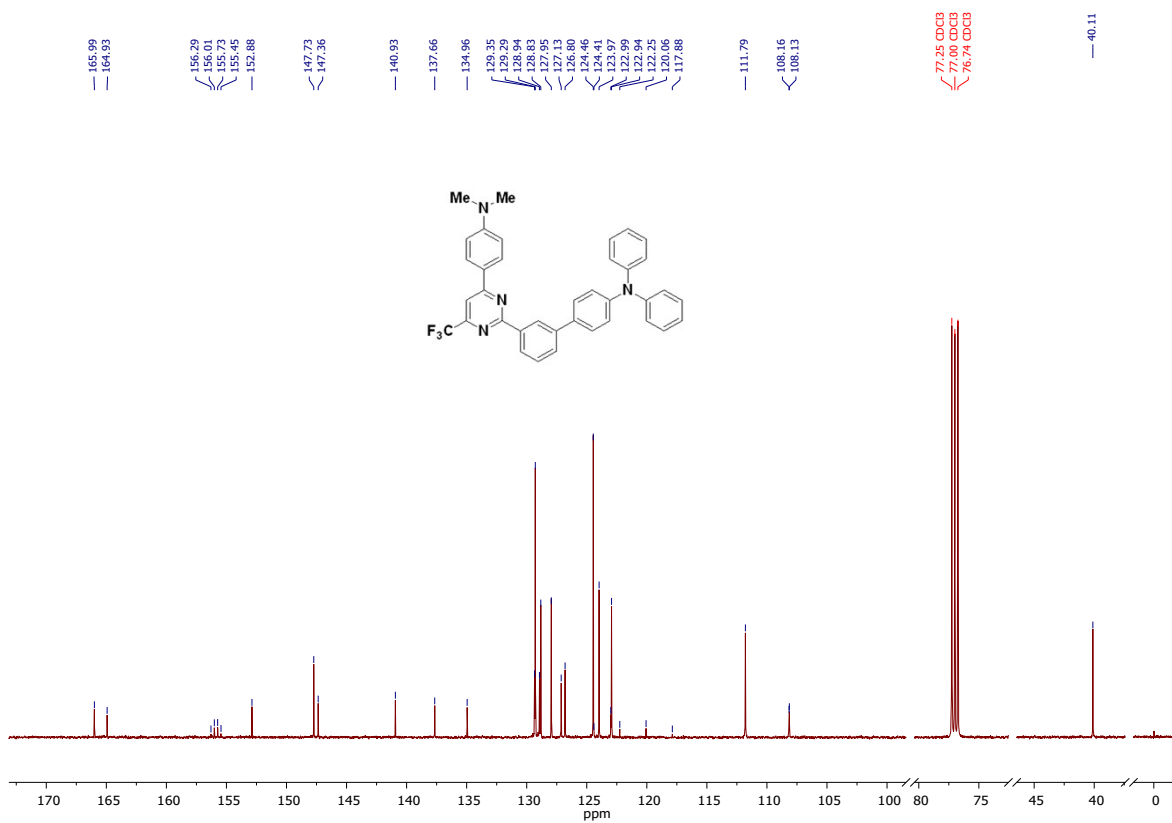

Figure S24. <sup>13</sup>C NMR (126 MHz, CDCl<sub>3</sub>) spectrum of 8a

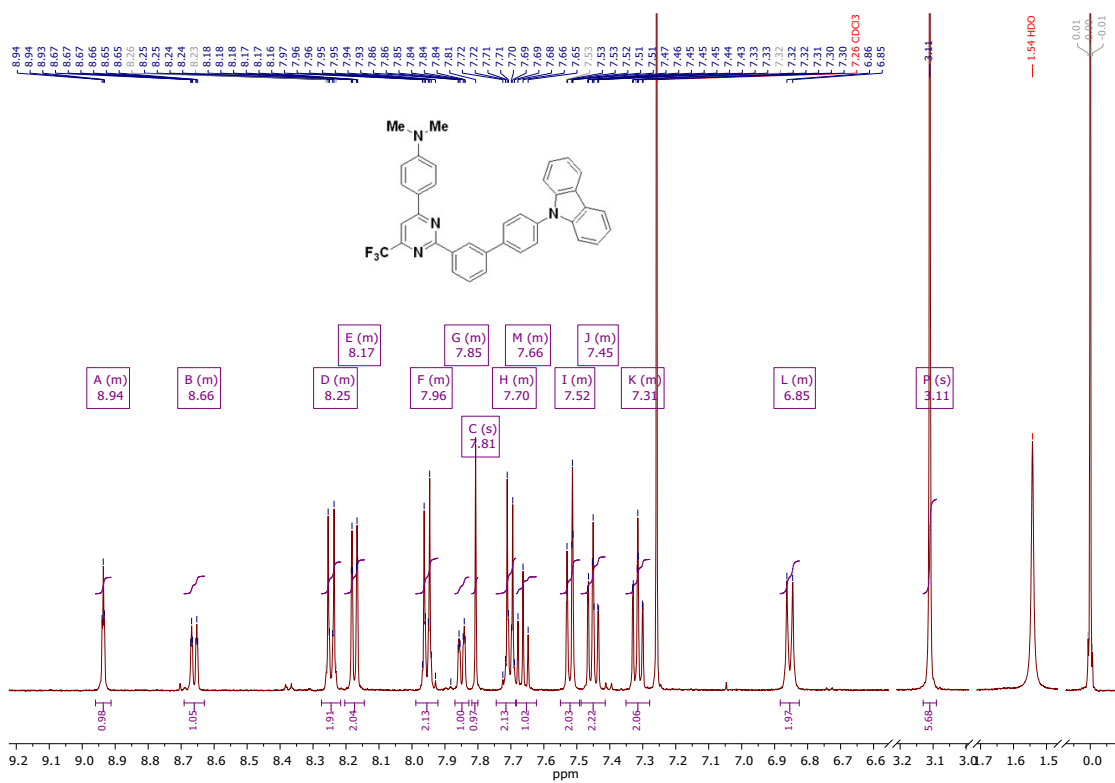

Figure S25. <sup>1</sup>H NMR (500 MHz, CDCl<sub>3</sub>) spectrum of **8b**

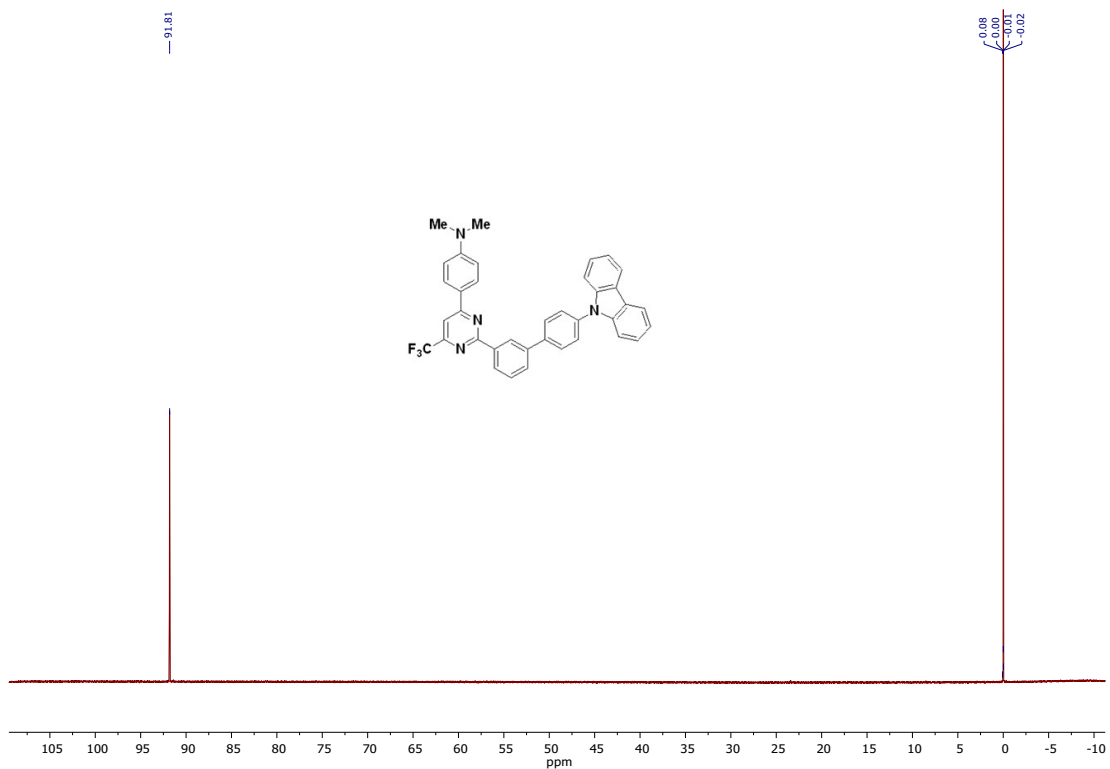

Figure S26. <sup>19</sup>F NMR (471 MHz, CDCl<sub>3</sub>) spectrum of **8b**

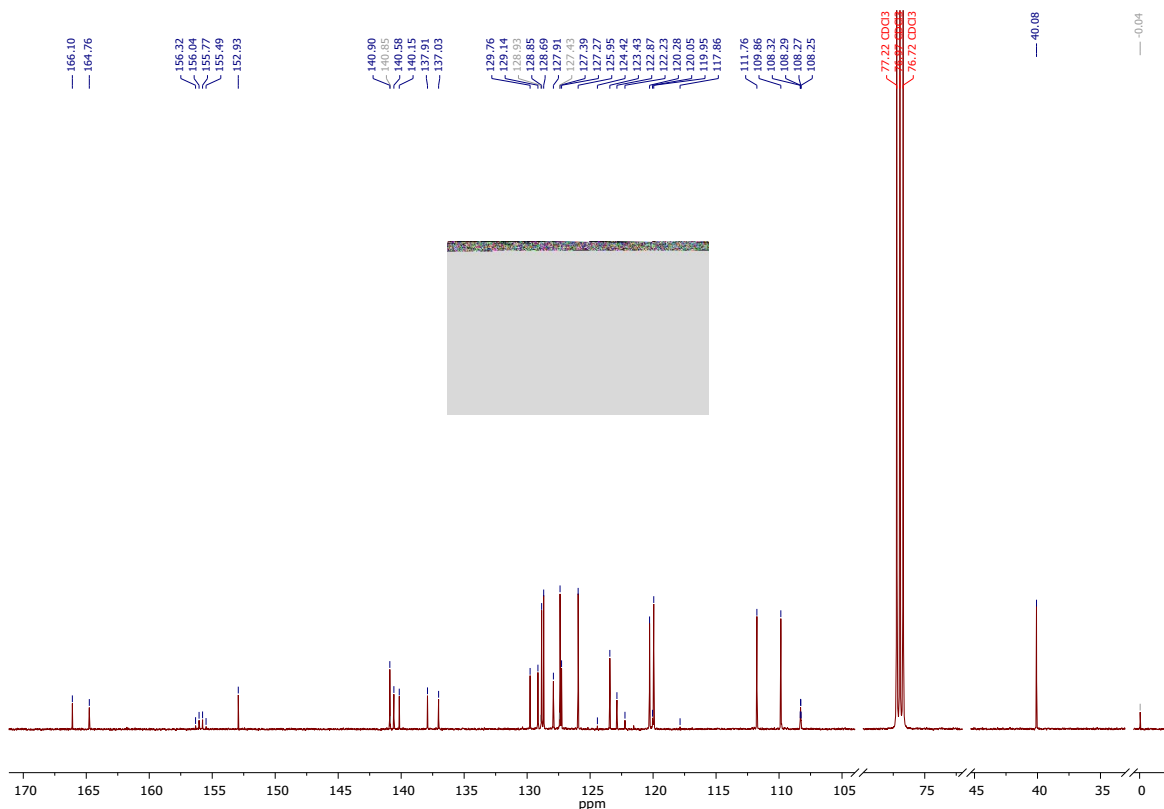

Figure S27. <sup>13</sup>C NMR (126 MHz, CDCl<sub>3</sub>) spectrum of **8b**

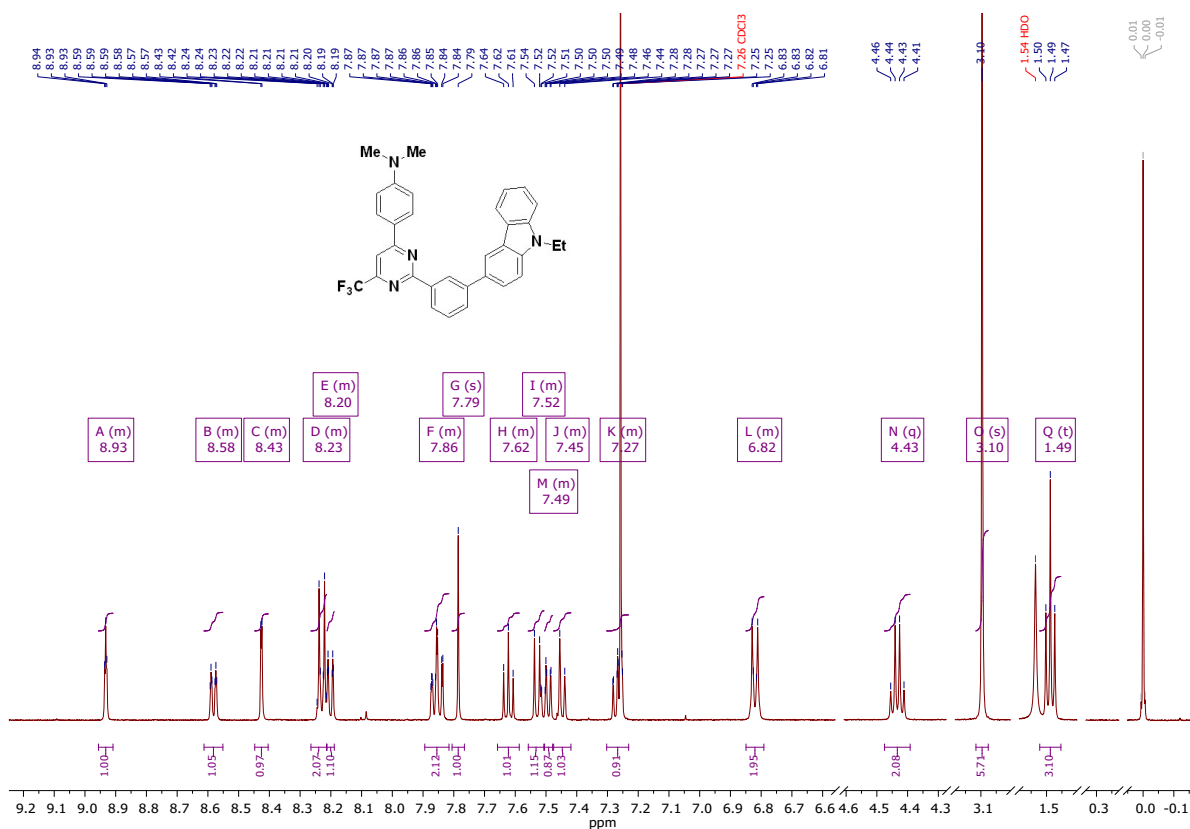

Figure S28. <sup>1</sup>H NMR (500 MHz, CDCl<sub>3</sub>) spectrum of **8c**

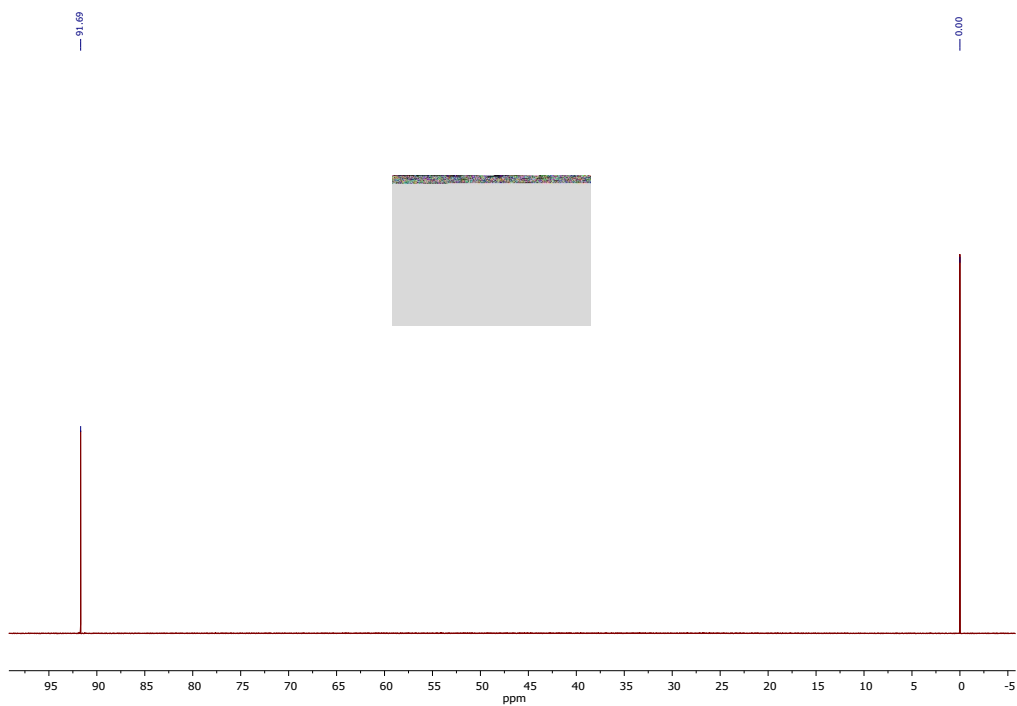

Figure S29.  $^{19}\text{F}$  NMR (471 MHz,  $\text{CDCl}_3$ ) spectrum of **8c**

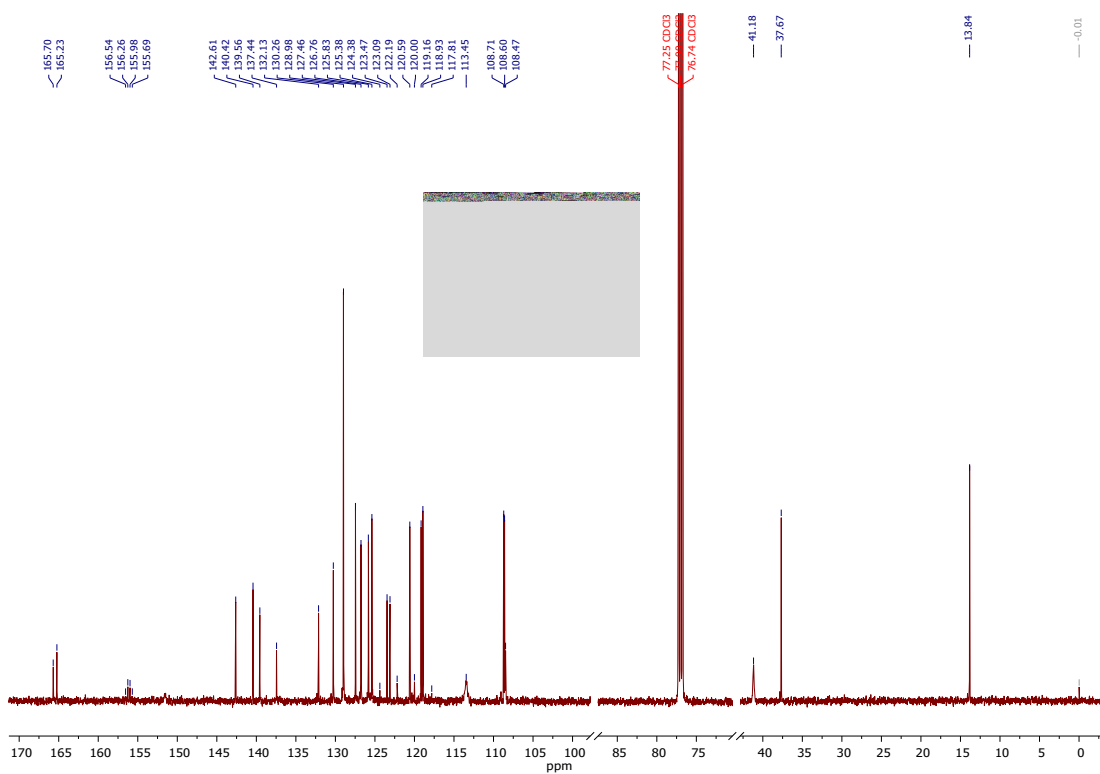

Figure S30.  $^{13}\text{C}$  NMR (126 MHz,  $\text{CDCl}_3$ ) spectrum of **8c**

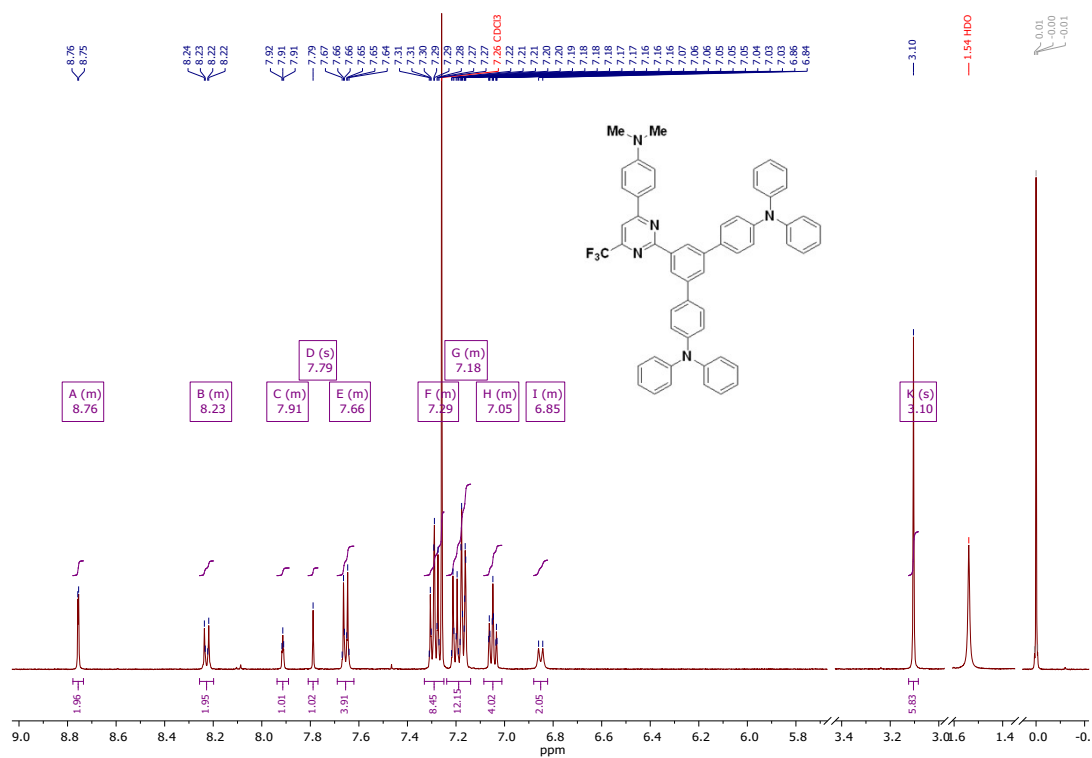

**Figure S31.** <sup>1</sup>H NMR (500 MHz, CDCl<sub>3</sub>) spectrum of **9a**

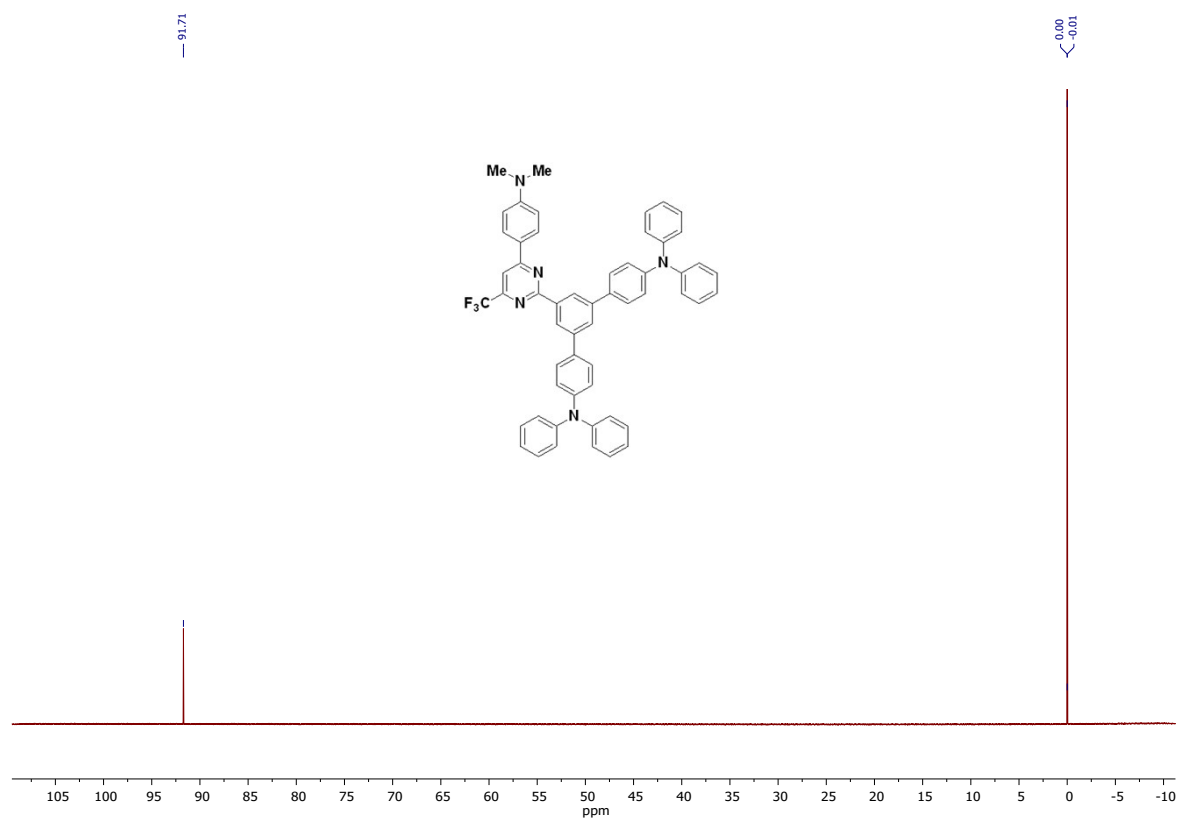

**Figure S32.** <sup>19</sup>F NMR (471 MHz, CDCl<sub>3</sub>) spectrum of **9a**

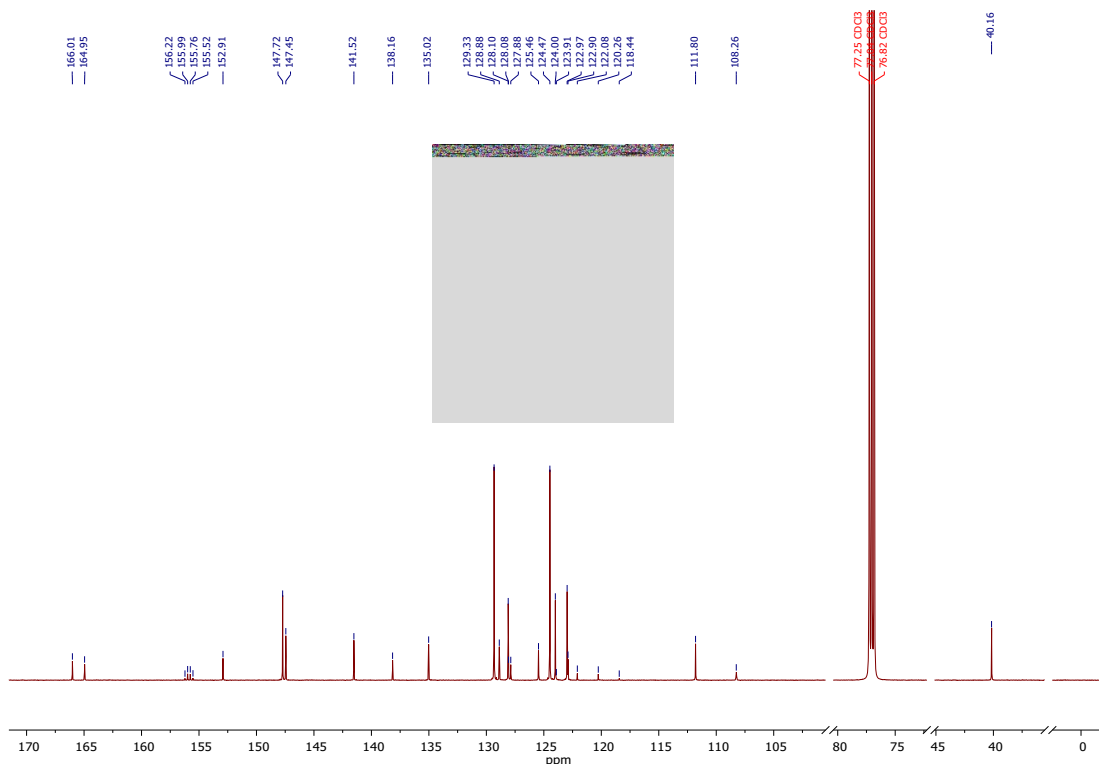

Figure S33. <sup>13</sup>C NMR (151 MHz, CDCl<sub>3</sub>) spectrum of **9a**

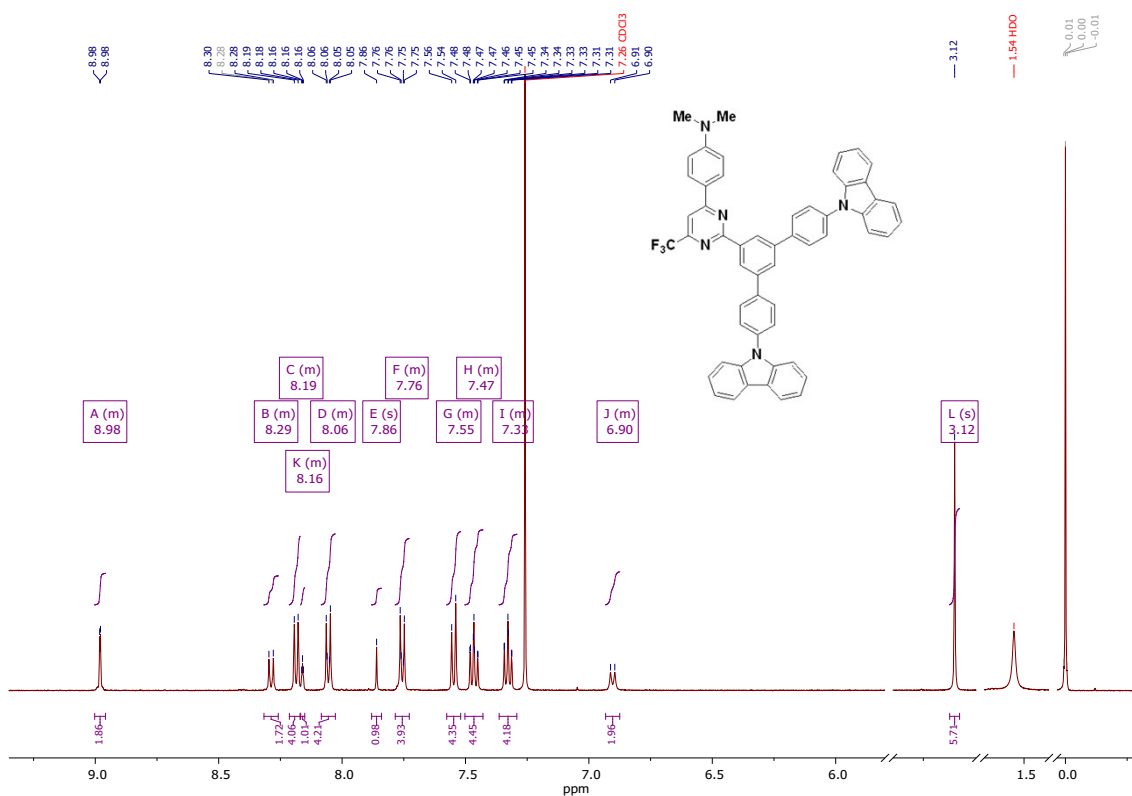

Figure S34. <sup>1</sup>H NMR (500 MHz, CDCl<sub>3</sub>) spectrum of **9b**

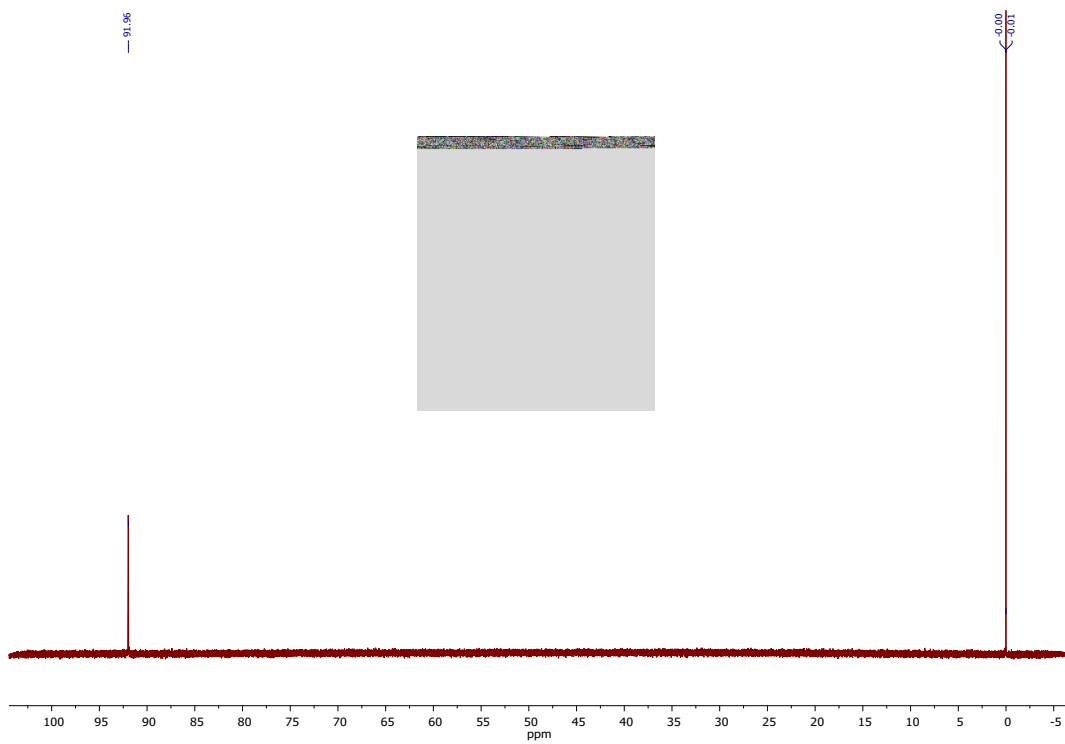

Figure S35.  $^{19}\text{F}$  NMR (471 MHz,  $\text{CDCl}_3$ ) spectrum of **9b**

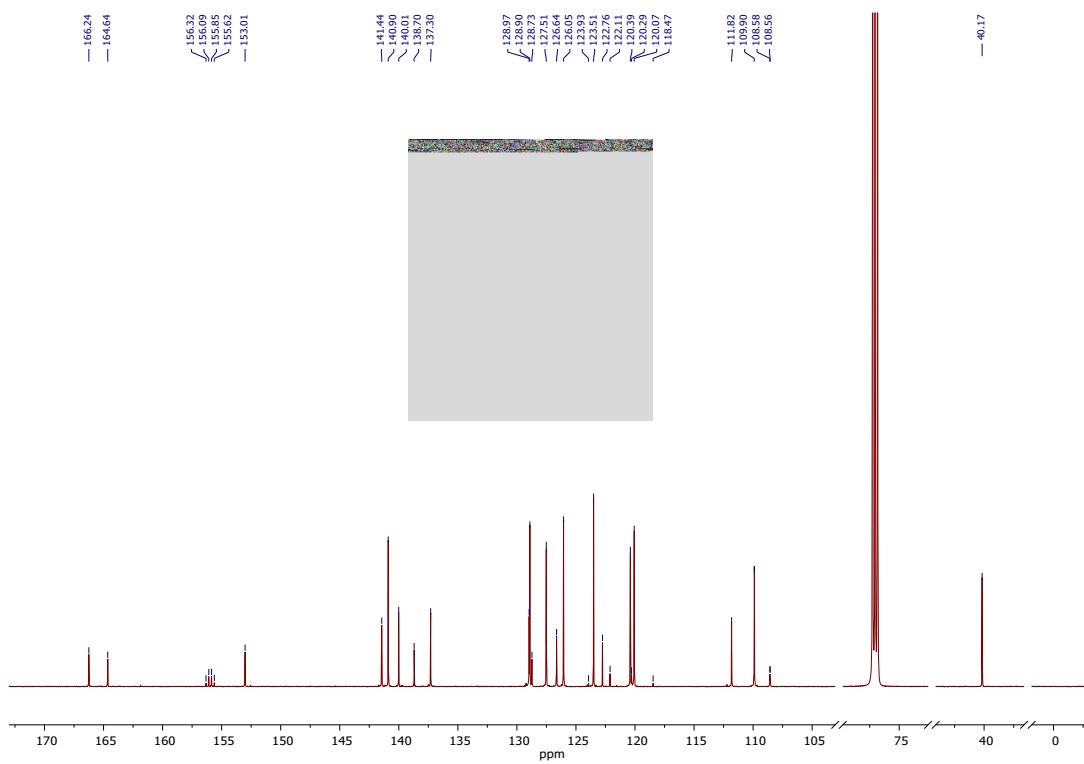

Figure S36.  $^{13}\text{C}$  NMR (151 MHz,  $\text{CDCl}_3$ ) spectrum of **9b**

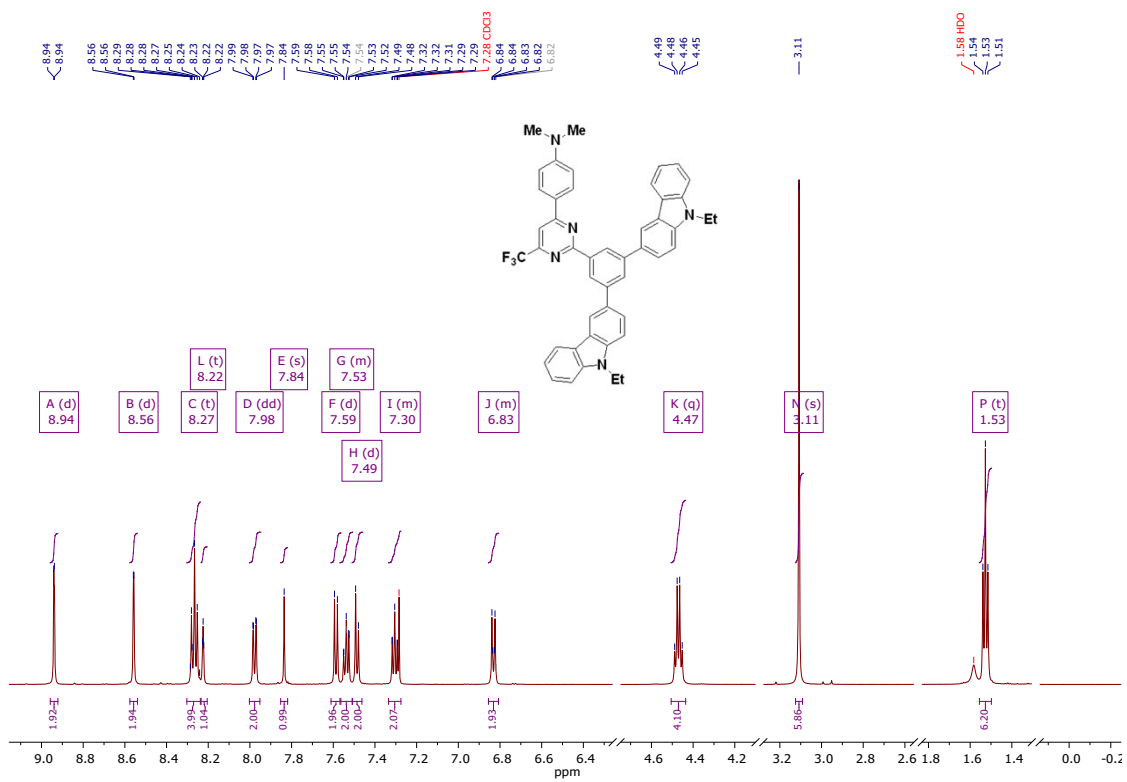

**Figure S37.**  $^1\text{H}$  NMR (600 MHz,  $\text{CDCl}_3$ ) spectrum of **9c**

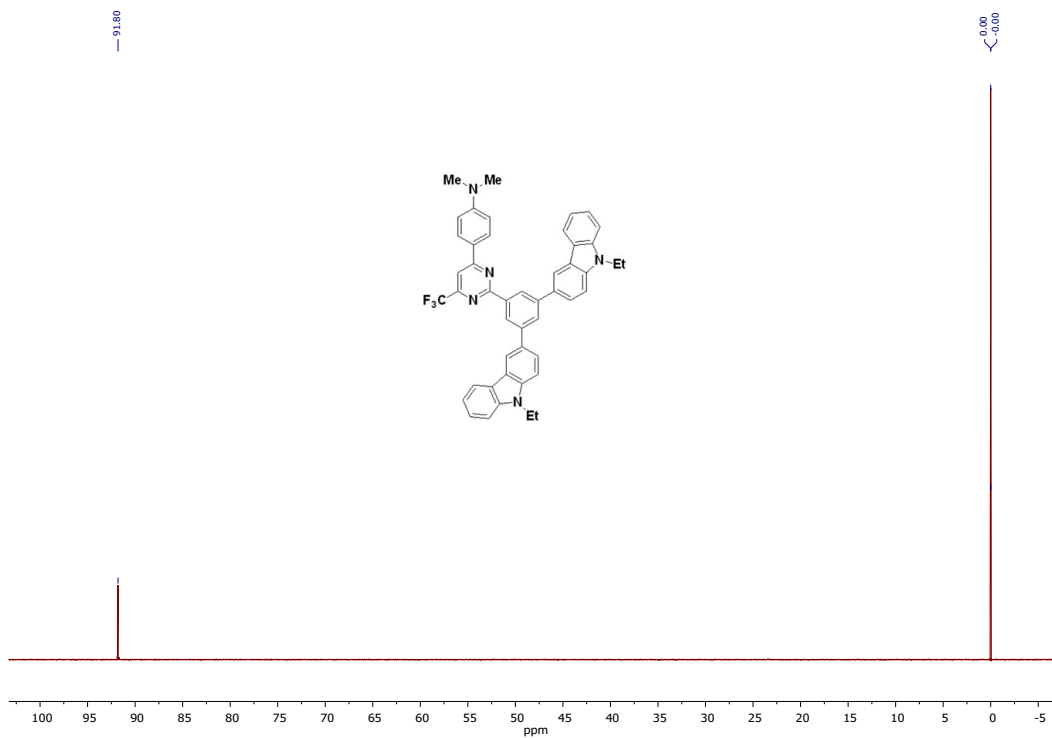

**Figure S38.**  $^{19}\text{F}$  NMR (376 MHz,  $\text{CDCl}_3$ ) spectrum of **9c**

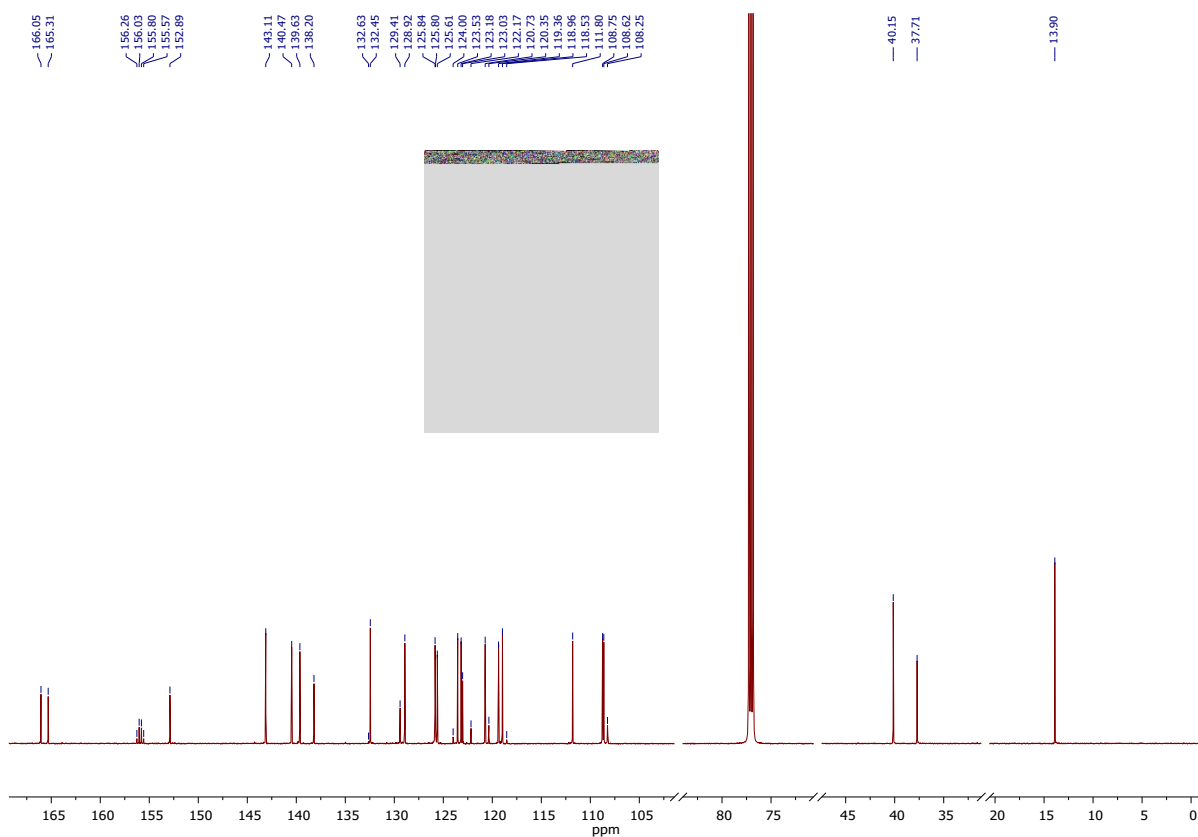

**Figure S39.**  $^{13}\text{C}$  NMR (151 MHz,  $\text{CDCl}_3$ ) spectrum of **9c**

**Table S1.** Calculated fluorescence emission wavelengths obtained using MN15 and CAM-B3LYP functionals

|             |    | Fluorescence, nm |           |            |
|-------------|----|------------------|-----------|------------|
|             |    | MN15             | CAM-B3LYP | Experiment |
| Chloroform  | 7a | 429              | 392       | 480        |
|             | 8a | 441              | 398       | 451        |
|             | 8b | 443              | 400       | 447        |
|             | 9a | 442              | 398       | 450        |
|             | 9c | 433              | 341       | 447        |
| Cyclohexane | 7a | 414              | 390       | 434        |
|             | 8a | 431              | 390       | 406        |
|             | 9c | 428              | 339       | 407        |

**Table S2. Spectral characteristics of the studied push-pull systems in different solvents**

|           | Cyclohexane ( $\epsilon = 2$ ) |                            |           | Toluene ( $\epsilon = 2.4$ ) |                            |           | Chloroform ( $\epsilon = 4.5$ ) |                            |           | Acetonitrile ( $\epsilon = 38$ ) |                            |           |
|-----------|--------------------------------|----------------------------|-----------|------------------------------|----------------------------|-----------|---------------------------------|----------------------------|-----------|----------------------------------|----------------------------|-----------|
|           | $\lambda_{\text{abs}}$ , nm    | $\lambda_{\text{fl}}$ , nm | $\varphi$ | $\lambda_{\text{abs}}$ , nm  | $\lambda_{\text{fl}}$ , nm | $\varphi$ | $\lambda_{\text{abs}}$ , nm     | $\lambda_{\text{fl}}$ , nm | $\varphi$ | $\lambda_{\text{abs}}$ , nm      | $\lambda_{\text{fl}}$ , nm | $\varphi$ |
| <b>7a</b> | 376<br>288<br>261              | 411<br>434                 | 0.85      | 381                          | 442                        | 0.66      | 381                             | 480                        | 0.96      | 380                              | 554                        | 0.024     |
| <b>7b</b> | 364<br>345<br>292              | 389<br>407                 | 0.51      | 376<br>346                   | 430                        | 0.34      | 376<br>347<br>293<br>243        | 450                        | 0.43      | 376<br>343<br>291<br>259<br>234  | ~560                       | 0.024     |
| <b>7c</b> | 369<br>302<br>259              | 385<br>406                 | 0.57      | 374<br>307                   | 426                        | 0.47      | 373<br>305<br>244               | 446                        | 0.54      | 375<br>303<br>246                | 527-550                    | 0.1       |
| <b>8a</b> | 360<br>314<br>247              | 394<br>406                 | 0.45      | 374<br>315                   | 428                        | 0.50      | 374<br>315<br>242               | 451                        | 0.18      | 378<br>344<br>310<br>253         | 526                        | 0.06      |
| <b>8b</b> | 350<br>242                     | 387<br>405                 | 0.52      | 377                          | 427                        | 0.50      | 377<br>283<br>244               | 447                        | 0.63      | 380<br>280                       | ~524                       | 0.10      |
| <b>8c</b> | 375<br>351<br>311<br>245       | 390<br>405                 | 0.33      | 380<br>352<br>313            | 431                        | 0.42      | 350<br>315<br>245               | 456                        | 0.12      | 381<br>350<br>310                | 502                        | 0.066     |
| <b>9a</b> | 368<br>345                     | 387<br>406                 | 0.54      | 379<br>345<br>330<br>294     | 429                        | 0.49      | 378<br>346<br>331<br>294<br>245 | 450                        | 0.57      | 379<br>343                       | ~514                       | 0.088     |
| <b>9b</b> | 370<br>342<br>293<br>260       | 391<br>410                 | 0.47      | 382<br>343<br>329<br>294     | 437                        | 0.42      | 381<br>344<br>295<br>248        | 452                        | 0.56      | 383<br>341<br>327<br>292         | ~520                       | 0.076     |
| <b>9c</b> | 372<br>355                     | 386<br>404                 | 0.25      | 380                          | 430                        | 0.59      | 380<br>290<br>265               | 447                        | 0.65      | 381<br>264                       | 533                        | 0.085     |

$\lambda_{\text{abs}}$  - absorption maximum;  $\lambda_{\text{fl}}$  - fluorescence maximum;  $\varphi$  - quantum yield;  $\epsilon$  - permittivity

**Table S3. Contour plots of the frontier orbitals of the studied push-pull systems with the largest contributions to the  $S_0 \rightarrow S_1$  transition**

|    |                                                                                                                                         |                                                                                      |
|----|-----------------------------------------------------------------------------------------------------------------------------------------|--------------------------------------------------------------------------------------|
| 7a | 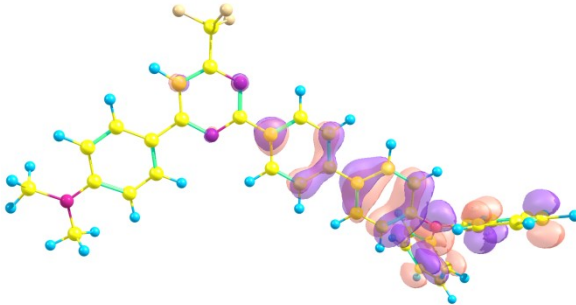 <p>HOMO <math>\rightarrow</math> LUMO (0.665)</p>     |    |
| 7b |  <p>HOMO <math>\rightarrow</math> LUMO (0.645)</p>    |   |
| 7c |  <p>HOMO <math>\rightarrow</math> LUMO (0.659)</p>   |  |
| 8a |  <p>HOMO-1 <math>\rightarrow</math> LUMO (0.651)</p> |  |

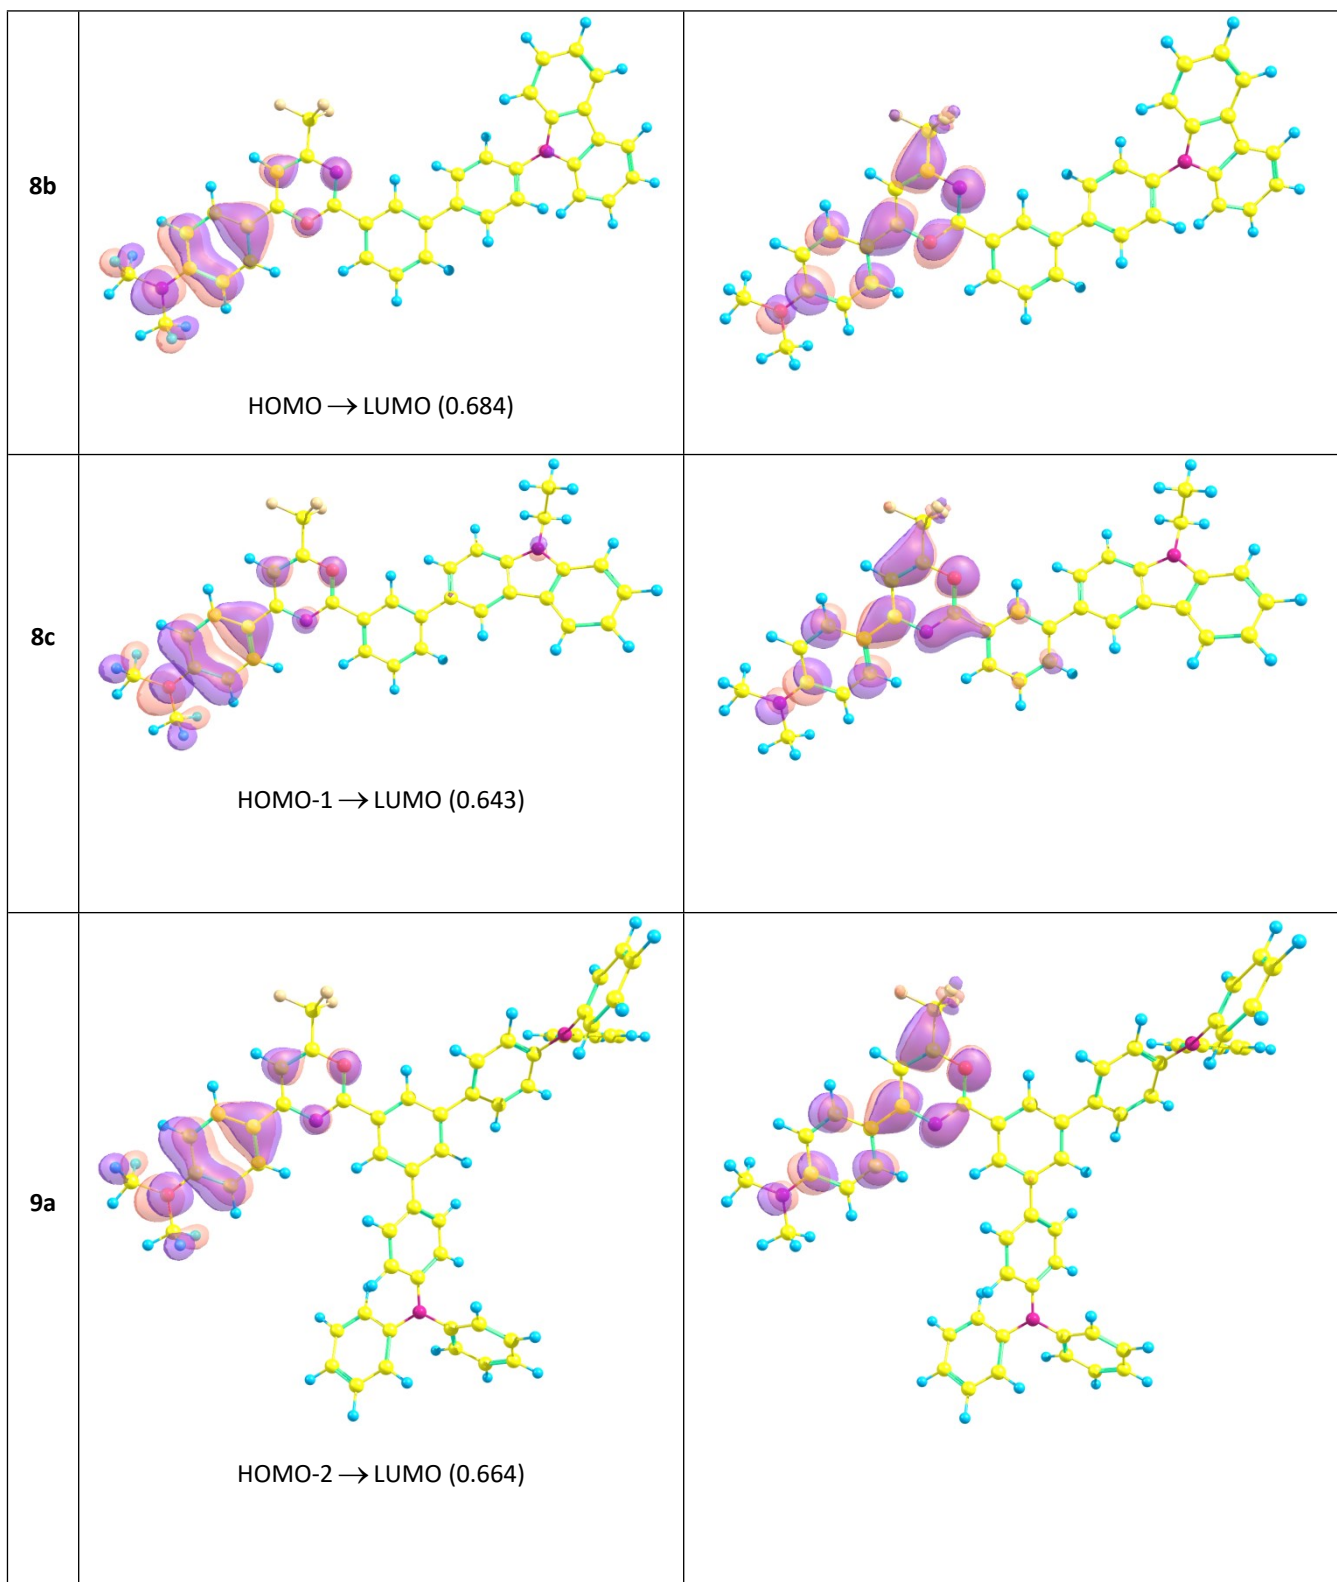

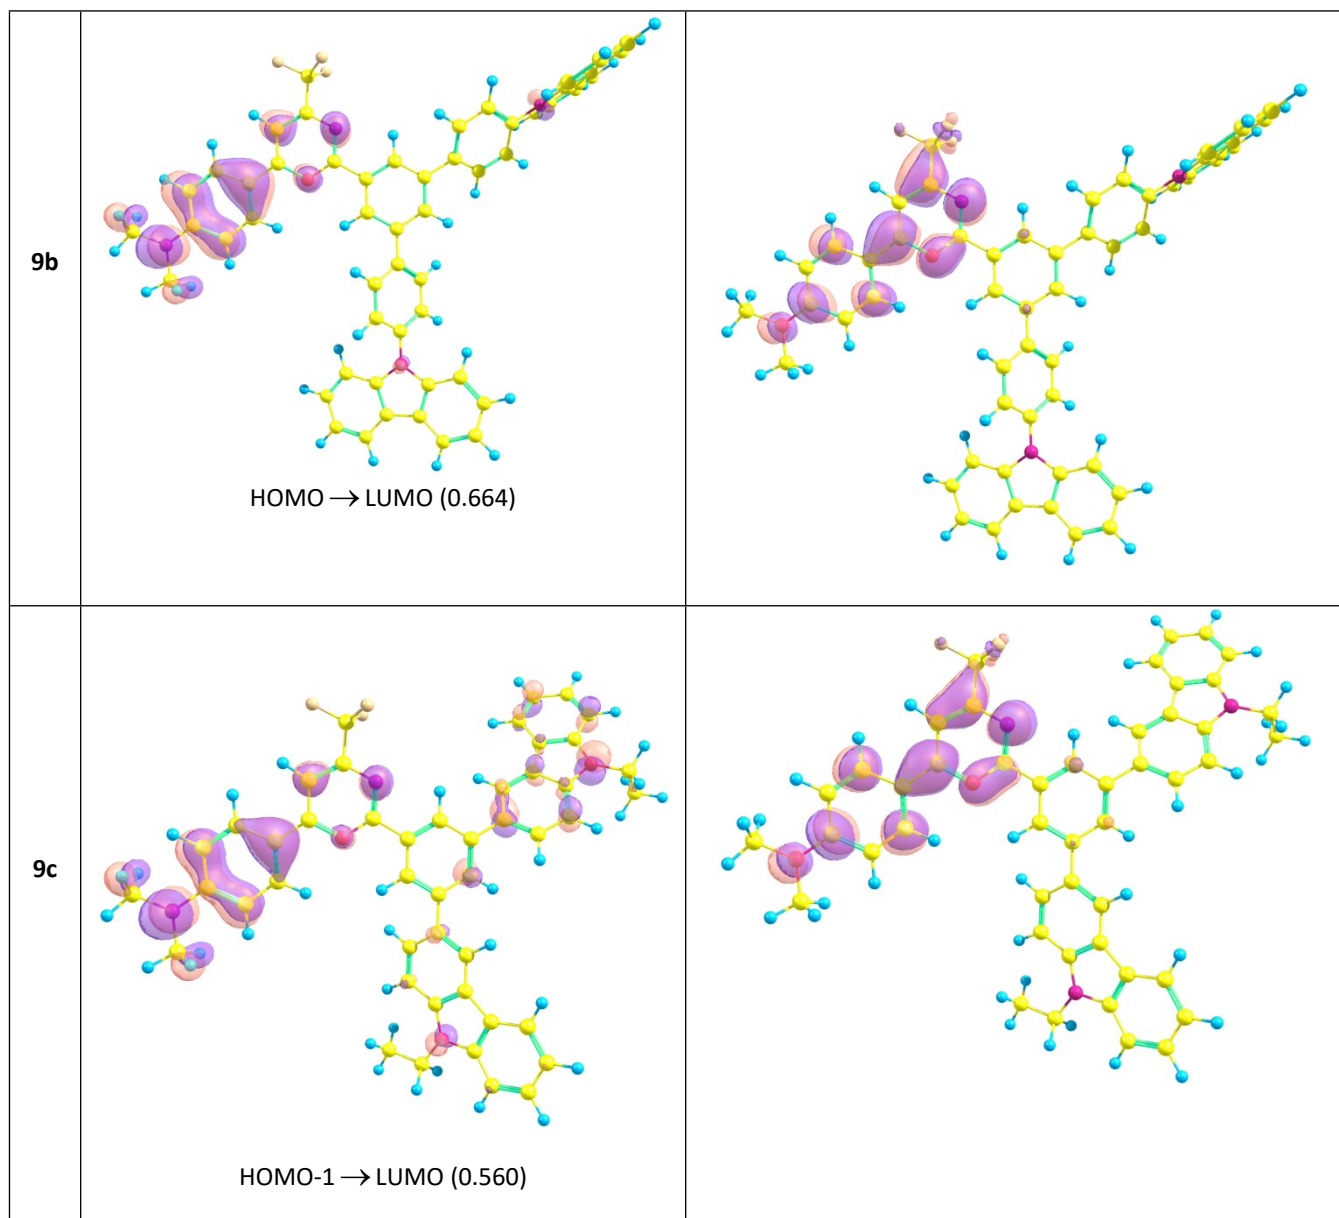

**Table S4. External Quantum Efficiency (EQE) of OLEDs based on push-pull systems**

|    | $E_{ph\_avg}, 10^{-19}J$ | $L_e, W/m^2$ | $J/S, A/m^2$ | EQE    |
|----|--------------------------|--------------|--------------|--------|
| 7a | 3.80                     | 0.623        | 6382         | 0.0001 |
| 7b | 4.75                     | 0.931        | 6056         | 0.0001 |
| 7c | 5.40                     | 0.757        | 6765         | 0.0002 |
| 8a | 3.70                     | 0.247        | 1561         | 0.0002 |
| 8b | 3.74                     | 1.108        | 3926         | 0.0001 |
| 8c | 3.61                     | 0.146        | 3807         | 0.0004 |
| 9a | 3.94                     | 1.111        | 4202         | 0.0003 |
| 9b | 3.81                     | 2.051        | 3858         | 0.0005 |
| 9c | 3.73                     | 0.997        | 2516         | 0.0007 |

EQE was determined based on measurements of the average photon energy ( $E_{ph\_avg}$ ), current density ( $J/S$ ), and radiance ( $L_e$ ).

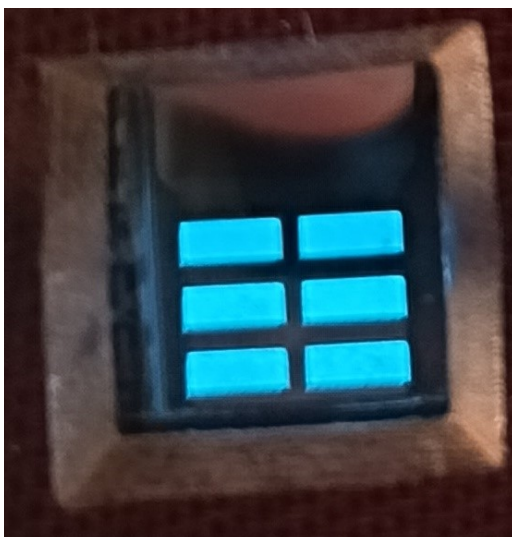

**Figure S40.** The photo of the emission for device based on the compound **9b**
